# Supplementary material for: Mechanistic insights into higher alcohol synthesis from syngas on Rh/Cu single-atom alloy catalysts
Source: Royal Society of Chemistry journal article supplement (doi:10.1039/c9cp06379j), 2020-01-01
Supplement: c9cp06379j1.pdf [file c9cp06379j1.pdf]

## Electronic Supplementary Information

### Mechanistic Insights into Higher Alcohol Synthesis from Syngas on Rh/Cu Single-Atom Alloy

#### Catalysts

Yihao Gao,<sup>a,b</sup> Lei Shi,<sup>b</sup> Shenggang Li,<sup>\* b,c</sup> Qinghua Ren<sup>a</sup>

<sup>a</sup> Department of Chemistry, College of Sciences, Shanghai University, 99 Shangda Road, Shanghai 200444, China.

<sup>b</sup> CAS Key Laboratory of Low-Carbon Conversion Science and Engineering, Shanghai Advanced Research Institute, Chinese Academy of Sciences, 100 Haike Road, Pudong District, Shanghai 201203, China.

<sup>c</sup> School of Physical Science and Technology, ShanghaiTech University, 393 Middle Huaxia Road, Pudong District, Shanghai 201203, China.

\*E-mail: lisg@sari.ac.cn

This supplementary information is divided into two sections, briefly summarized below.

**Section 1:** Additional figures:

**Figure S1.** Initial state (left), transition state (middle), and final state (right) for some key elementary reactions on Rh/Cu(111) surface.

**Figure S2.** Initial state (left), transition state (middle), and final state (right) for some key elementary reactions on Rh/Cu(100) surface.

**Section 2:** Additional tables.

**Table S1.** Adsorption energies (eV) and key geometric parameters for the possible intermediates during ethanol formation from syngas on Rh/Cu SAA surfaces.

**Table S2.** Adsorption energies for several simple adsorbates on the Rh/Cu(111) and Rh/Cu(100) surfaces with a different number of atomic layers relaxed.

**Table S3.** Optimized fractional coordinates.

**Table S4.** Typical input files.

**Fig. S1.** Initial state (left), transition state (middle), and final state (right) for some key elementary reactions on Rh/Cu(111) surface.

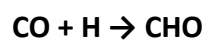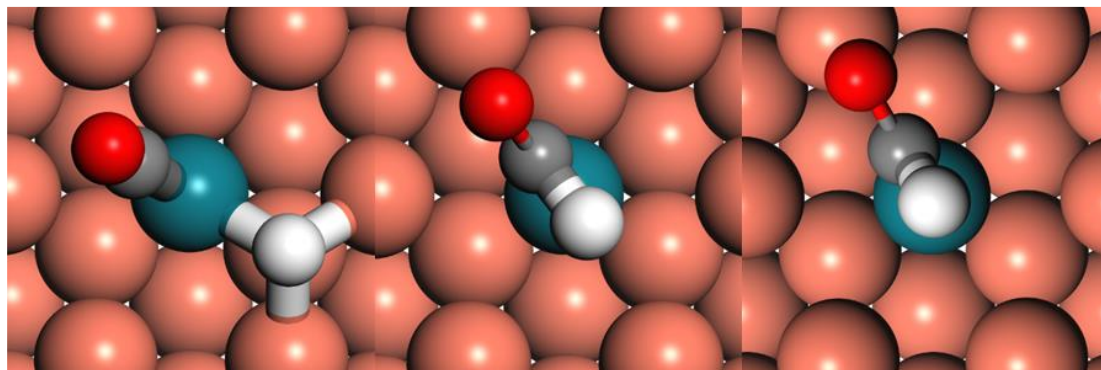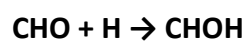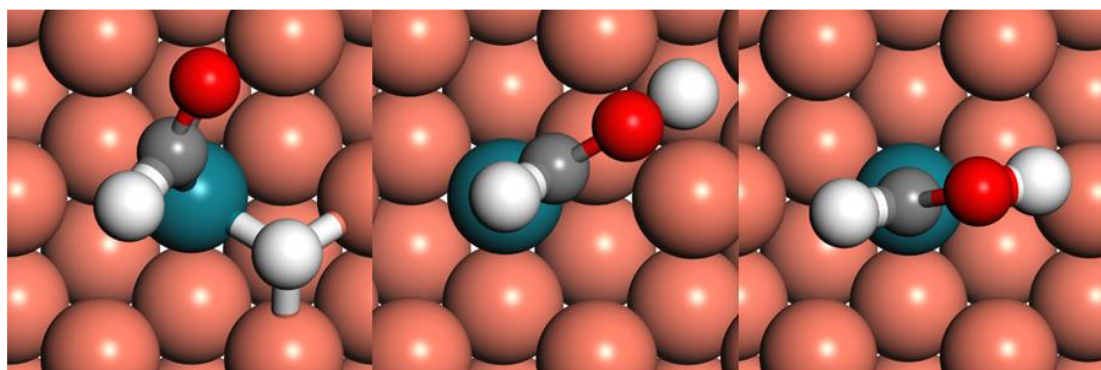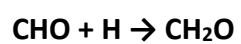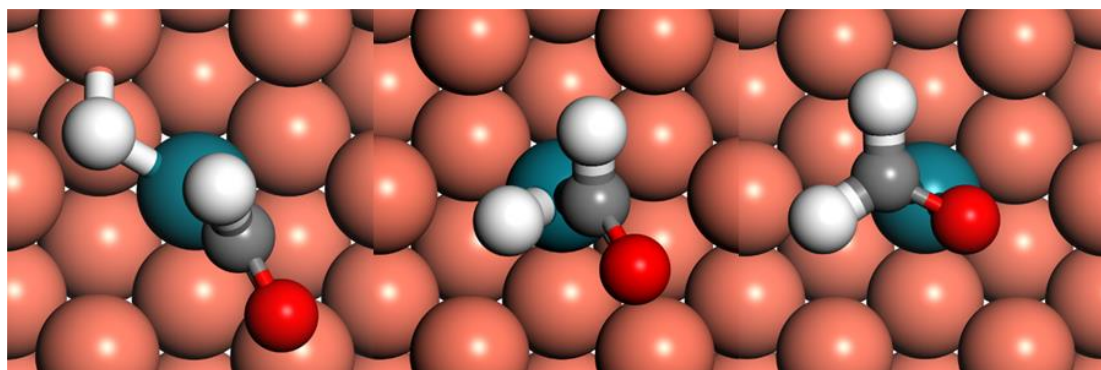

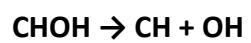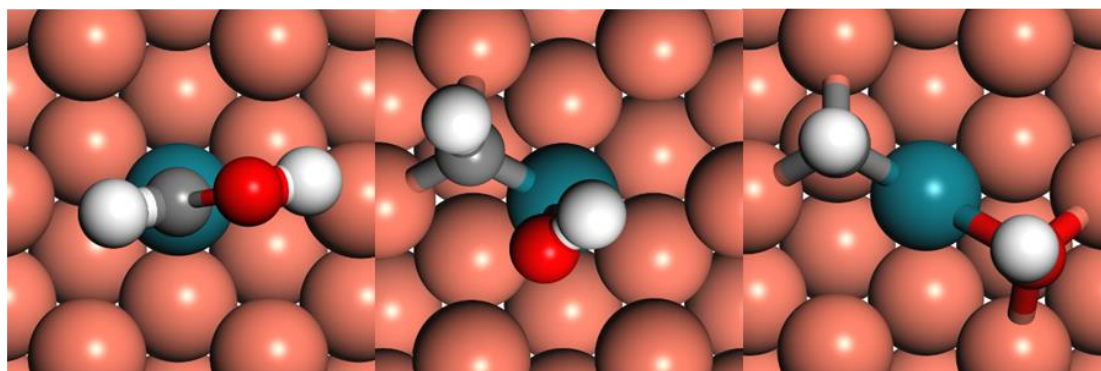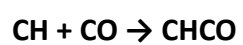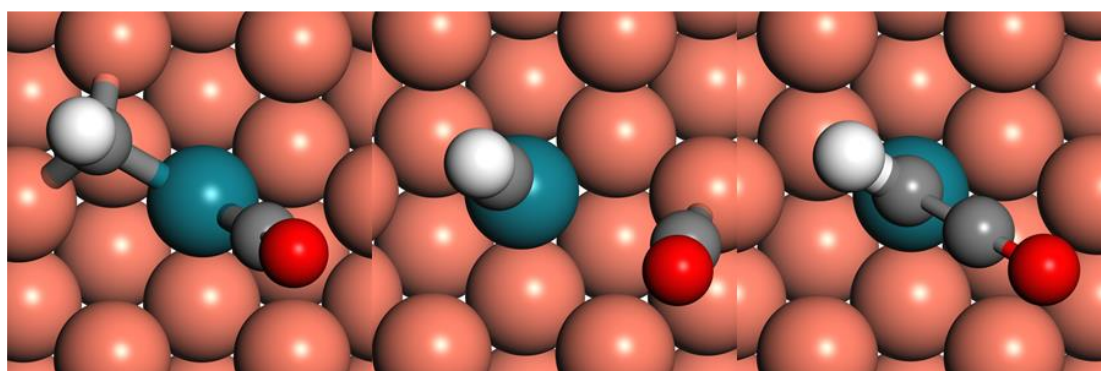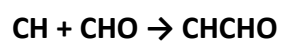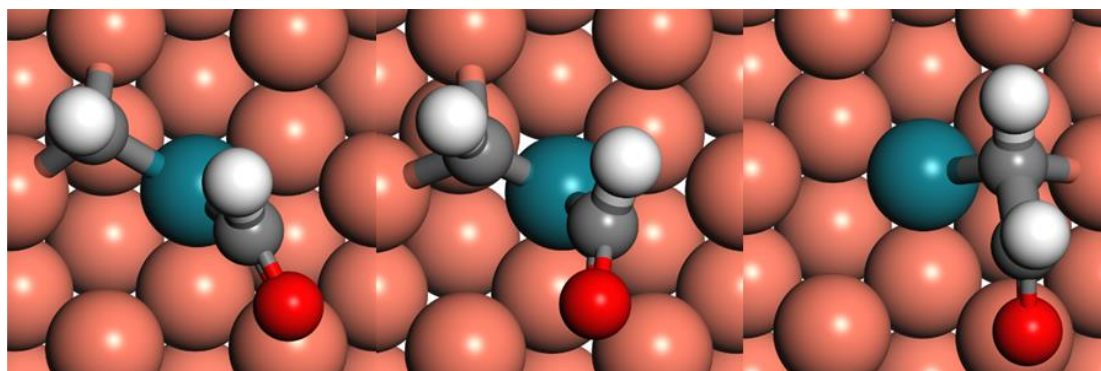

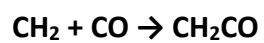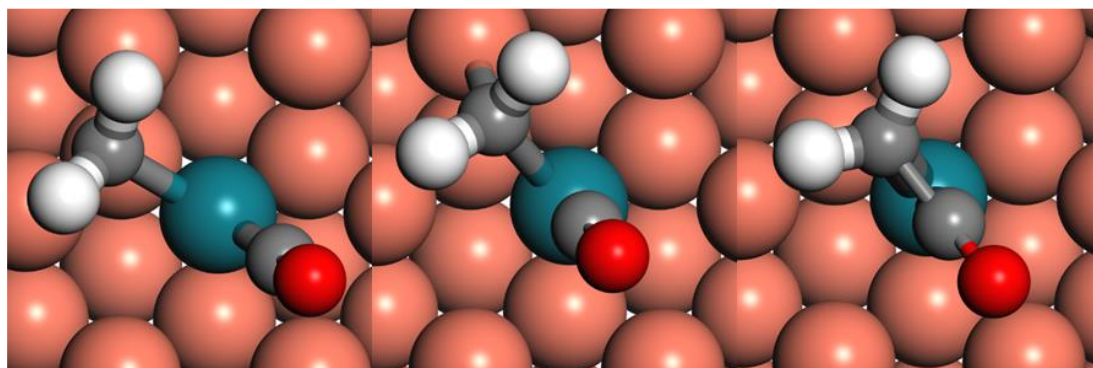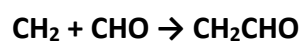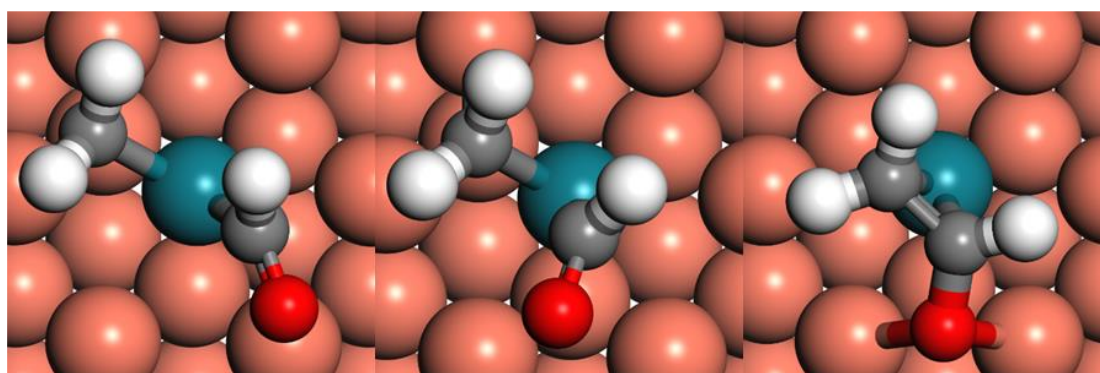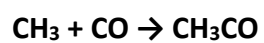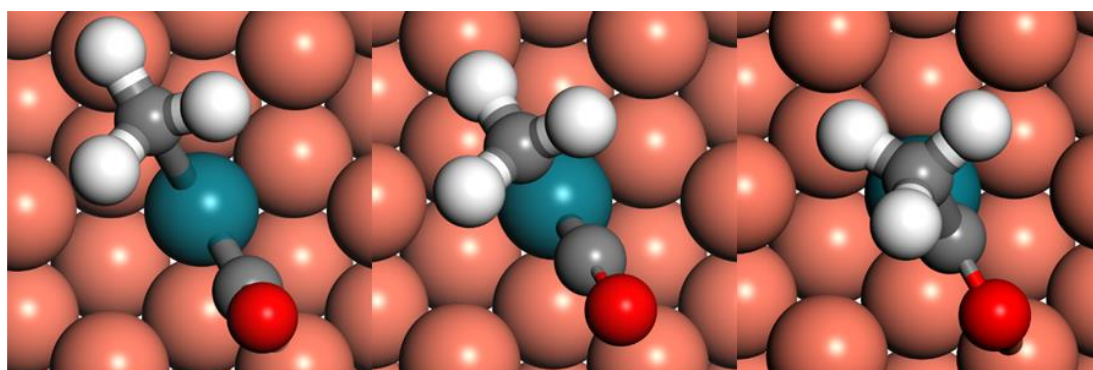

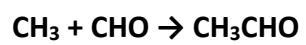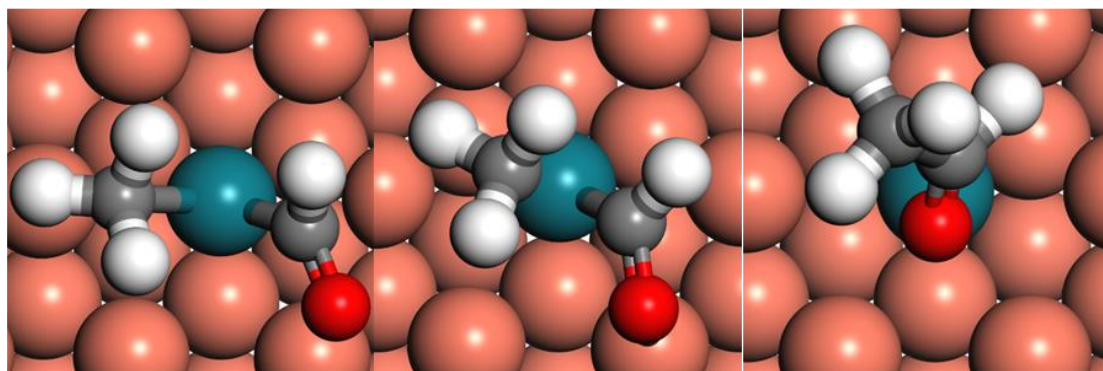

**Fig. S2.** Initial state (left), transition state (middle), and final state (right) for some key elementary reactions on Rh/Cu(100) surface.

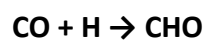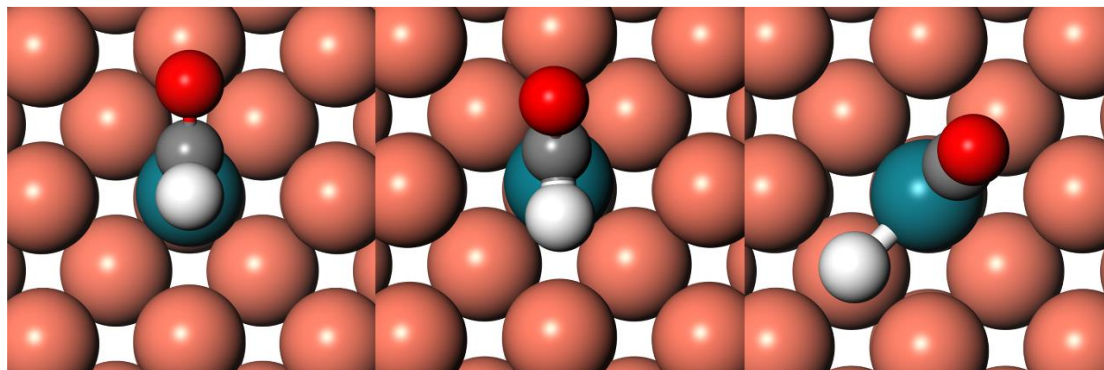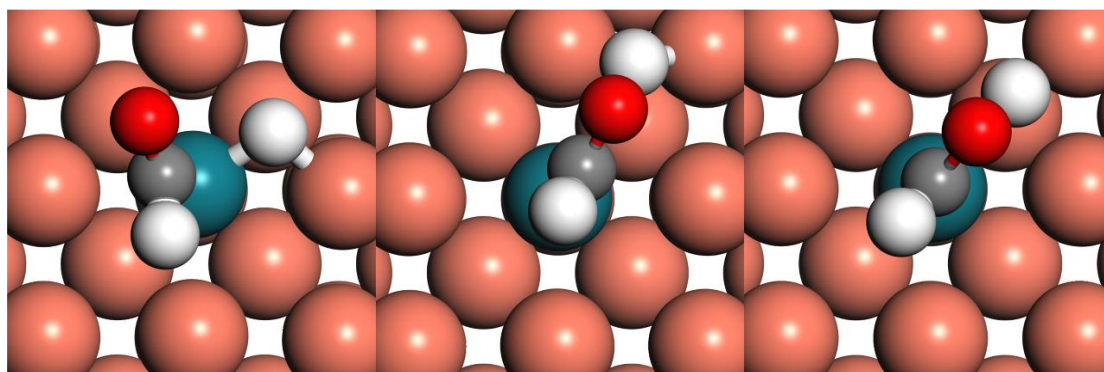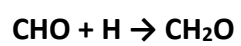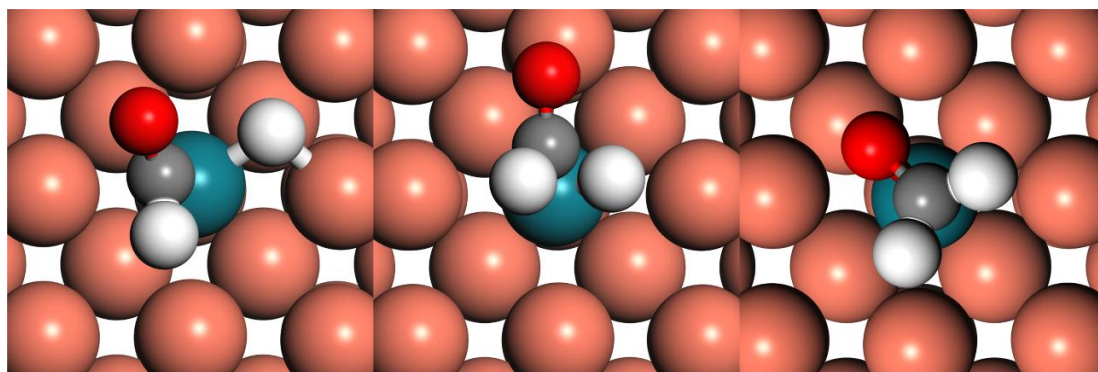

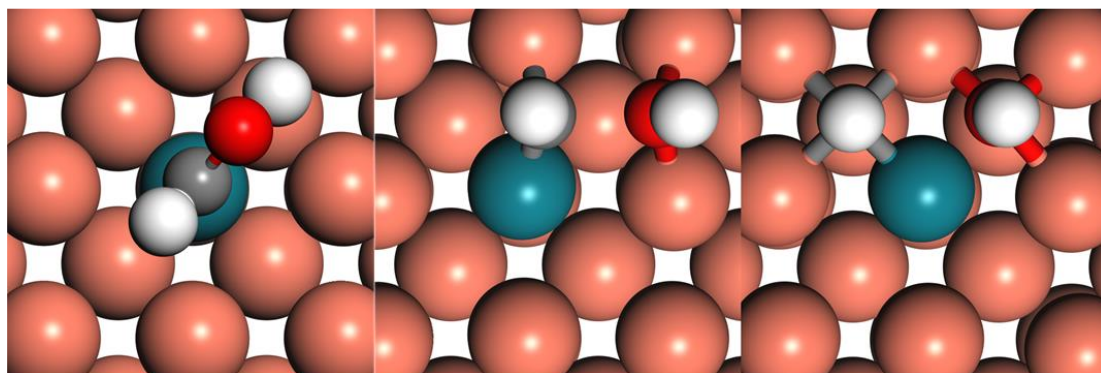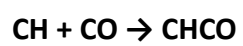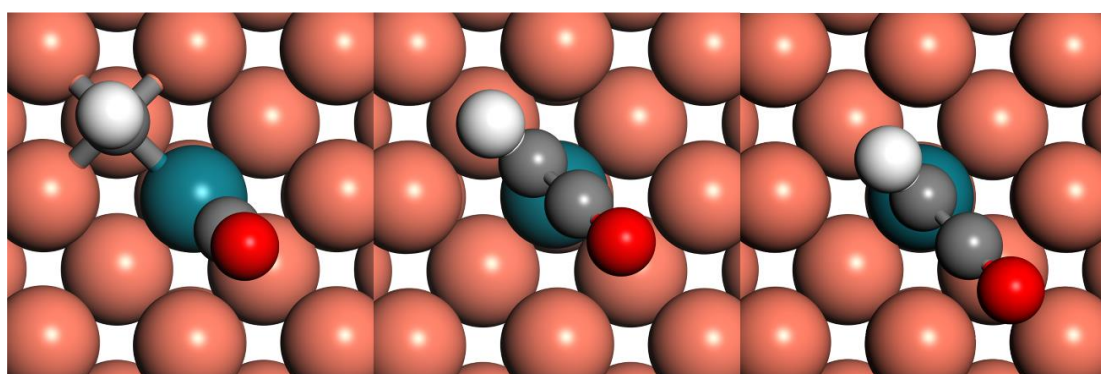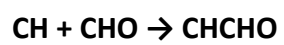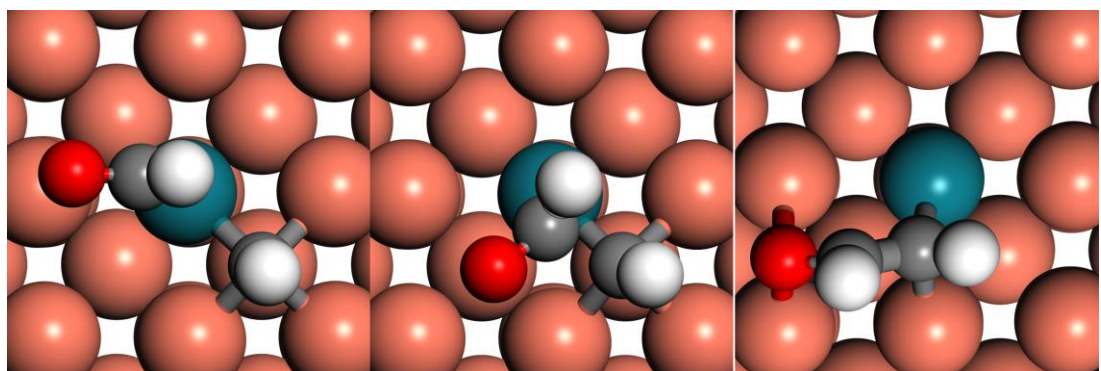



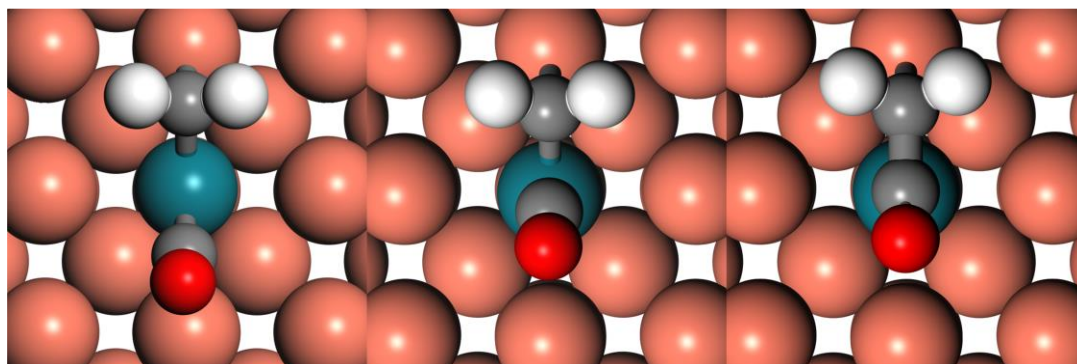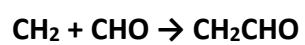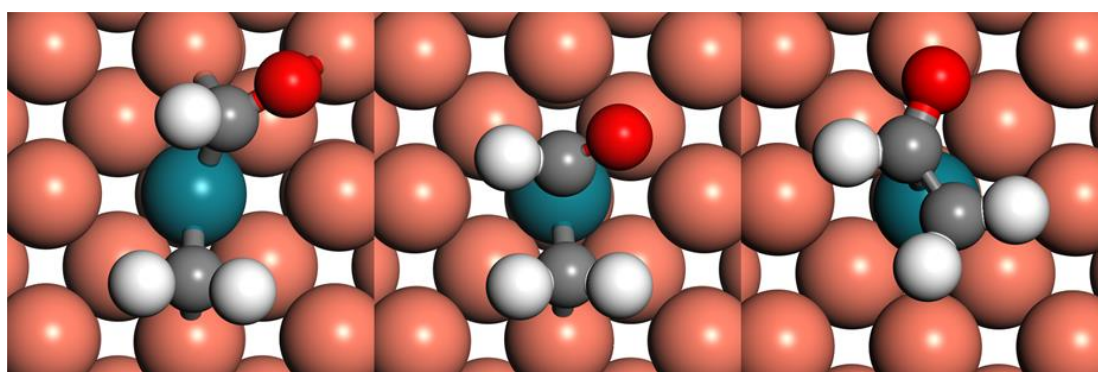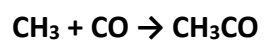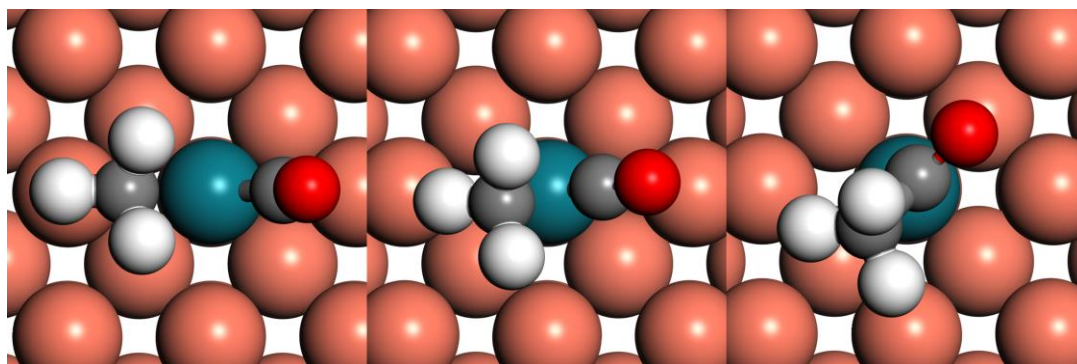

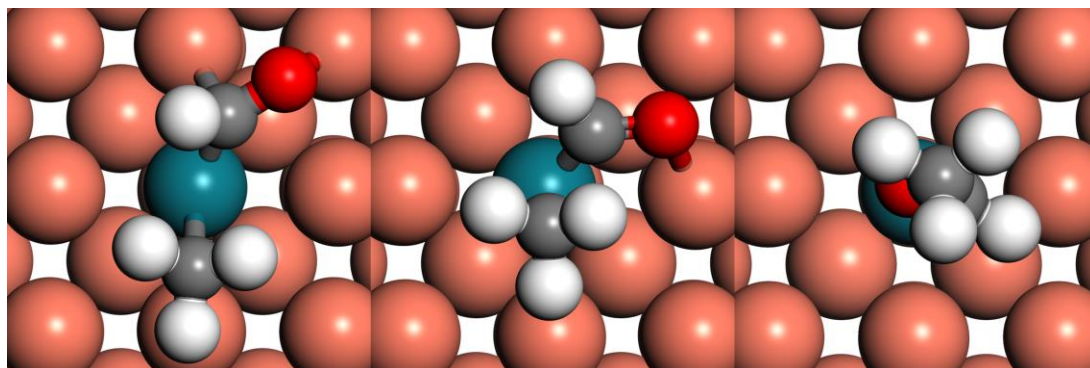

**Table S1.** Adsorption energies (eV) and key geometric parameters for the possible intermediates during ethanol formation from syngas on Rh/Cu SAA surfaces.

| Intermediates                      | Rh/Cu(111) |                     | Rh/Cu(100) |                     |
|------------------------------------|------------|---------------------|------------|---------------------|
|                                    | $E_{ad}$   | Adsorption Site     | $E_{ad}$   | Adsorption Site     |
| CO                                 | -1.64      | C <sub>d-t</sub>    | -1.80      | C <sub>d-t</sub>    |
| C                                  | -5.71      | C <sub>d-h</sub>    | -5.27      | C <sub>d-h</sub>    |
| O                                  | -6.34      | O <sub>d-h</sub>    | -5.63      | O <sub>d-h</sub>    |
| CHO                                | -2.02      | C <sub>d-t</sub>    | -2.24      | C <sub>d-t</sub>    |
| COH                                | -3.34      | C <sub>d-t</sub>    | -3.58      | C <sub>d-t</sub>    |
| CHOH                               | -3.62      | C <sub>d-t</sub>    | -3.59      | C <sub>d-t</sub>    |
| CH <sub>2</sub> O                  | -0.46      | C <sub>d-t</sub>    | -0.65      | C <sub>d-t</sub>    |
| CH <sub>2</sub> OH                 | -1.48      | C <sub>d-t</sub>    | -1.70      | C <sub>d-t</sub>    |
| CH <sub>3</sub> O                  | -2.14      | O <sub>d-h</sub>    | -2.34      | O <sub>d-h</sub>    |
| CH <sub>3</sub> OH                 | -0.42      | O <sub>d-t</sub>    | -0.50      | O <sub>d-t</sub>    |
| CH                                 | -4.39      | C <sub>d-h</sub>    | -5.07      | C <sub>d-h</sub>    |
| CH <sub>2</sub>                    | -3.19      | C <sub>d-b</sub>    | -3.17      | C <sub>d-b</sub>    |
| CH <sub>3</sub>                    | -1.52      | C <sub>d-h</sub>    | -1.70      | C <sub>d-h</sub>    |
| CH <sub>4</sub>                    | -0.13      | -                   | -0.14      | -                   |
| CHCO                               | -1.42      | C(H) <sub>d-t</sub> | -1.52      | C(H) <sub>d-t</sub> |
| CHCHO                              | -1.01      | C(H) <sub>d-t</sub> | -1.13      | C(H) <sub>d-t</sub> |
| CH <sub>2</sub> CO                 | -0.88      | C(H) <sub>d-t</sub> | -1.20      | C(H) <sub>d-t</sub> |
| CH <sub>2</sub> CHO                | -1.32      | C(H) <sub>d-t</sub> | -1.07      | C(H) <sub>d-t</sub> |
| CH <sub>3</sub> CO                 | -1.96      | C(O) <sub>d-t</sub> | -2.11      | C(O) <sub>d-t</sub> |
| CH <sub>3</sub> COH                | -2.34      | C(O) <sub>d-t</sub> | -2.57      | C(O) <sub>d-t</sub> |
| CH <sub>3</sub> CHO                | -0.35      | -                   | -0.51      | -                   |
| CH <sub>3</sub> CHOH               | -1.42      | C <sub>d-t</sub>    | -1.68      | C <sub>d-t</sub>    |
| CH <sub>3</sub> CH <sub>2</sub> O  | -1.87      | O <sub>d-h</sub>    | -2.07      | O <sub>d-h</sub>    |
| CH <sub>3</sub> CH <sub>2</sub> OH | -0.41      | -                   | -0.54      | -                   |
| H                                  | -3.55      | H <sub>d-t</sub>    | -3.55      | H <sub>d-t</sub>    |
| H <sub>2</sub>                     | -0.22      | -                   | -0.33      | -                   |
| OH                                 | -3.88      | O <sub>d-h</sub>    | -3.12      | O <sub>d-h</sub>    |
| H <sub>2</sub> O                   | -0.27      | -                   | -0.33      | -                   |

**Table S2.** Adsorption energies for several simple adsorbates on the Rh/Cu(111) and Rh/Cu(100) surfaces with a different number of atomic layers relaxed.

|                |   | $E_{ad}(eV)$ |       |       |       |
|----------------|---|--------------|-------|-------|-------|
| Layers relaxed |   | CO           | C     | O     | H     |
| Rh/Cu(111)     | 1 | -1.64        | -5.71 | -6.34 | -3.55 |
|                | 2 | -1.66        | -5.71 | -6.36 | -3.56 |
|                | 3 | -1.66        | -5.71 | -6.35 | -3.55 |
| Rh/Cu(100)     | 1 | -1.81        | -6.58 | -6.57 | -3.54 |
|                | 2 | -1.81        | -6.58 | -6.59 | -3.55 |
|                | 3 | -1.80        | -6.57 | -6.59 | -3.55 |

**Table S3.** Optimized fractional coordinates.

|                    |                    |                     |                     |       |
|--------------------|--------------------|---------------------|---------------------|-------|
| H-CO<br>Rh/Cu(100) | Cu Rh C O H        |                     |                     |       |
|                    | 1.0000000000000000 |                     |                     |       |
|                    | 7.6679000000000004 | 0.0000000000000000  | 0.0000000000000000  |       |
|                    | 0.0000000000000000 | 7.6679000000000004  | 0.0000000000000000  |       |
|                    | 0.0000000000000000 | 0.0000000000000000  | 13.6146999999999991 |       |
|                    | Cu Rh C O H        |                     |                     |       |
|                    | 26                 | 1                   | 1                   | 1     |
|                    | Selective dynamics |                     |                     |       |
|                    | Direct             |                     |                     |       |
|                    | 0.0000000000000000 | 0.1666688402300522  | 0.1327241878263905  | F F F |
|                    | 0.1666688402300522 | 0.0000000000000000  | 0.0000000000000000  | F F F |
|                    | 0.1662712390306511 | -0.0022424856069391 | 0.2673436382762973  | T T T |
|                    | 0.3333376804600975 | 0.1666688402300522  | 0.1327241878263905  | F F F |
|                    | 0.5000065206901496 | 0.0000000000000000  | 0.0000000000000000  | F F F |
|                    | 0.4997536945084138 | 0.0065149312655810  | 0.2667619271818923  | T T T |
|                    | 0.6666753609202019 | 0.1666688402300522  | 0.1327241878263905  | F F F |
|                    | 0.8333442011502470 | 0.0000000000000000  | 0.0000000000000000  | F F F |
|                    | 0.8333436647393340 | 0.9978178198878033  | 0.2673198709147468  | T T T |
|                    | 0.0000000000000000 | 0.5000065206901496  | 0.1327241878263905  | F F F |
|                    | 0.1666688402300522 | 0.3333376804600975  | 0.0000000000000000  | F F F |
|                    | 0.1637276108962195 | 0.3310937394049639  | 0.2678107260870029  | T T T |
|                    | 0.3333376804600975 | 0.5000065206901496  | 0.1327241878263905  | F F F |
|                    | 0.5000065206901496 | 0.3333376804600975  | 0.0000000000000000  | F F F |
|                    | 0.6666753609202019 | 0.5000065206901496  | 0.1327241878263905  | F F F |
|                    | 0.8333442011502470 | 0.3333376804600975  | 0.0000000000000000  | F F F |
|                    | 0.8384966024583448 | 0.3310103690021852  | 0.2679101634372273  | T T T |
|                    | 0.0000000000000000 | 0.8333442011502470  | 0.1327241878263905  | F F F |
|                    | 0.1666688402300522 | 0.6666753609202019  | 0.0000000000000000  | F F F |
|                    | 0.1662827340127671 | 0.6651578345473055  | 0.2673934826371221  | T T T |
|                    | 0.3333376804600975 | 0.8333442011502470  | 0.1327241878263905  | F F F |
|                    | 0.5000065206901496 | 0.6666753609202019  | 0.0000000000000000  | F F F |
|                    | 0.4995036563388847 | 0.6829746121281811  | 0.2679634581527156  | T T T |
|                    | 0.6666753609202019 | 0.8333442011502470  | 0.1327241878263905  | F F F |
|                    | 0.8333442011502470 | 0.6666753609202019  | 0.0000000000000000  | F F F |
|                    | 0.8332680478458524 | 0.6652035127021068  | 0.2673091644180289  | T T T |
|                    | 0.5013565487293019 | 0.3507589574212912  | 0.2859046199609856  | T T T |
|                    | 0.5059941198358999 | 0.4216195739193817  | 0.4185771234695195  | T T T |
|                    | 0.5121130733391148 | 0.5310806850838508  | 0.4815446644704494  | T T T |
|                    | 0.4983988694192233 | 0.2724117583130475  | 0.4332200443974589  | T T T |

|                    |                                                                                                                                                                                                                                                                                                                                                                                                                                                                                                                                                                                                                                                                                                                                                                                                                                                                                                                                                                                                                                                                                                                                                                                                                                                                                                                                                                                                                                                                                                                                                                                                                                                                                                                                                                                                                                                                                                                                                                                                                                                          |
|--------------------|----------------------------------------------------------------------------------------------------------------------------------------------------------------------------------------------------------------------------------------------------------------------------------------------------------------------------------------------------------------------------------------------------------------------------------------------------------------------------------------------------------------------------------------------------------------------------------------------------------------------------------------------------------------------------------------------------------------------------------------------------------------------------------------------------------------------------------------------------------------------------------------------------------------------------------------------------------------------------------------------------------------------------------------------------------------------------------------------------------------------------------------------------------------------------------------------------------------------------------------------------------------------------------------------------------------------------------------------------------------------------------------------------------------------------------------------------------------------------------------------------------------------------------------------------------------------------------------------------------------------------------------------------------------------------------------------------------------------------------------------------------------------------------------------------------------------------------------------------------------------------------------------------------------------------------------------------------------------------------------------------------------------------------------------------------|
| H-CO<br>Rh/Cu(111) | Cu Rh C O H                                                                                                                                                                                                                                                                                                                                                                                                                                                                                                                                                                                                                                                                                                                                                                                                                                                                                                                                                                                                                                                                                                                                                                                                                                                                                                                                                                                                                                                                                                                                                                                                                                                                                                                                                                                                                                                                                                                                                                                                                                              |
|                    | 1.0000000000000000<br>7.6679000000000004 0.0000000000000000 0.0000000000000000<br>-3.8339499999999997 6.6405961900000001 0.0000000000000000<br>0.0000000000000000 0.0000000000000000 19.1738999999999997                                                                                                                                                                                                                                                                                                                                                                                                                                                                                                                                                                                                                                                                                                                                                                                                                                                                                                                                                                                                                                                                                                                                                                                                                                                                                                                                                                                                                                                                                                                                                                                                                                                                                                                                                                                                                                                 |
|                    | Cu Rh C O H<br>26 1 1 1 1                                                                                                                                                                                                                                                                                                                                                                                                                                                                                                                                                                                                                                                                                                                                                                                                                                                                                                                                                                                                                                                                                                                                                                                                                                                                                                                                                                                                                                                                                                                                                                                                                                                                                                                                                                                                                                                                                                                                                                                                                                |
|                    | Selective dynamics                                                                                                                                                                                                                                                                                                                                                                                                                                                                                                                                                                                                                                                                                                                                                                                                                                                                                                                                                                                                                                                                                                                                                                                                                                                                                                                                                                                                                                                                                                                                                                                                                                                                                                                                                                                                                                                                                                                                                                                                                                       |
|                    | Direct                                                                                                                                                                                                                                                                                                                                                                                                                                                                                                                                                                                                                                                                                                                                                                                                                                                                                                                                                                                                                                                                                                                                                                                                                                                                                                                                                                                                                                                                                                                                                                                                                                                                                                                                                                                                                                                                                                                                                                                                                                                   |
|                    | 0.2929540879960022 0.1427755333075625 0.2193522795853962 T T T<br>0.0740787133764584 0.0370448665995440 0.0000000000000000 F F F<br>0.1852133131750904 0.2593140661968150 0.1088458790334812 F F F<br>0.6305821380552858 0.1411698561397930 0.2184406147709744 T T T<br>0.4074163938365558 0.0370448665995440 0.0000000000000000 F F F<br>0.5185509936351949 0.2593140661968150 0.1088458790334812 F F F<br>0.9641832757403002 0.1459536734763266 0.2190893490377451 T T T<br>0.7407540742966533 0.0370448665995440 0.0000000000000000 F F F<br>0.8518886740952922 0.2593140661968150 0.1088458790334812 F F F<br>0.2931150198985357 0.4793301658637448 0.2186759856012864 T T T<br>0.0740364784000534 0.3702980771068383 0.0000000000000000 F F F<br>0.1851710781986975 0.5925672767041092 0.1088458790334812 F F F<br>0.4073741588601507 0.3702980771068383 0.0000000000000000 F F F<br>0.5185087586587898 0.5925672767041092 0.1088458790334812 F F F<br>0.9687823363500591 0.4802714602288265 0.2192612473997663 T T T<br>0.7407118393202556 0.3702980771068383 0.0000000000000000 F F F<br>0.8518464391188871 0.5925672767041092 0.1088458790334812 F F F<br>0.2969205893385314 0.8126217367929037 0.2192508774208815 T T T<br>0.0740695378679563 0.7037018765027483 0.0000000000000000 F F F<br>0.1852041376666058 0.9259710761000194 0.1088458790334812 F F F<br>0.6305358715767553 0.8164078691431078 0.2179133676027657 T T T<br>0.4074072183280708 0.7037018765027483 0.0000000000000000 F F F<br>0.5185418181267129 0.9259710761000194 0.1088458790334812 F F F<br>0.9675829905593895 0.8167045618758437 0.2190284851415585 T T T<br>0.7407448987881580 0.7037018765027483 0.0000000000000000 F F F<br>0.8518794985868173 0.9259710761000194 0.1088458790334812 F F F<br>0.6312752009424348 0.4772095998094154 0.2309607801144714 T T T<br>0.6418551442478578 0.4004514880956925 0.3249558874189482 T T T<br>0.6577794955810762 0.2944676393188240 0.3676656497992180 T T T<br>0.6196339025223473 0.5345435380583251 0.3390933827576074 T T T |

|                     |                                                                                                                                                                                                                                                                                                                                                                                                                                                                                                                                                                                                                                                                                                                                                                                                                                                                                                                                                                                                                                                                                                                                                                                                                                                                                                                                                                                                                                                                                                                                                                                                                                                                                                                                                                                                                                                                                                                                                                                                                                                                                                                                                                                                                                                                                                                                                                                                           |
|---------------------|-----------------------------------------------------------------------------------------------------------------------------------------------------------------------------------------------------------------------------------------------------------------------------------------------------------------------------------------------------------------------------------------------------------------------------------------------------------------------------------------------------------------------------------------------------------------------------------------------------------------------------------------------------------------------------------------------------------------------------------------------------------------------------------------------------------------------------------------------------------------------------------------------------------------------------------------------------------------------------------------------------------------------------------------------------------------------------------------------------------------------------------------------------------------------------------------------------------------------------------------------------------------------------------------------------------------------------------------------------------------------------------------------------------------------------------------------------------------------------------------------------------------------------------------------------------------------------------------------------------------------------------------------------------------------------------------------------------------------------------------------------------------------------------------------------------------------------------------------------------------------------------------------------------------------------------------------------------------------------------------------------------------------------------------------------------------------------------------------------------------------------------------------------------------------------------------------------------------------------------------------------------------------------------------------------------------------------------------------------------------------------------------------------------|
| CHO-H<br>Rh/Cu(100) | Cu Rh C O H                                                                                                                                                                                                                                                                                                                                                                                                                                                                                                                                                                                                                                                                                                                                                                                                                                                                                                                                                                                                                                                                                                                                                                                                                                                                                                                                                                                                                                                                                                                                                                                                                                                                                                                                                                                                                                                                                                                                                                                                                                                                                                                                                                                                                                                                                                                                                                                               |
|                     | 1.000000000000000<br>7.6679000000000004 0.0000000000000000 0.0000000000000000<br>0.0000000000000000 7.6679000000000004 0.0000000000000000<br>0.0000000000000000 0.0000000000000000 13.6146999999999991<br><br>Cu Rh C O H<br>26 1 1 1 2<br><br>Selective dynamics<br>Direct<br>0.0000000000000000 0.1666688402300522 0.1327241878263905 F F F<br>0.1666688402300522 0.0000000000000000 0.0000000000000000 F F F<br>0.1657612935243426 0.9984450576870839 0.2678863527198245 T T T<br>0.3333376804600974 0.1666688402300522 0.1327241878263905 F F F<br>0.5000065206901496 0.0000000000000000 0.0000000000000000 F F F<br>0.4983909152068889 0.0029767492508711 0.2686379345944701 T T T<br>0.6666753609202019 0.1666688402300522 0.1327241878263905 F F F<br>0.8333442011502470 0.0000000000000000 0.0000000000000000 F F F<br>0.8314146592418283 1.0022797710369917 0.2685737036957067 T T T<br>0.0000000000000000 0.5000065206901496 0.1327241878263905 F F F<br>0.1666688402300522 0.3333376804600974 0.0000000000000000 F F F<br>0.1643849343009574 0.3318428006113556 0.2685120835726303 T T T<br>0.3333376804600974 0.5000065206901496 0.1327241878263905 F F F<br>0.5000065206901496 0.3333376804600974 0.0000000000000000 F F F<br>0.6666753609202019 0.5000065206901496 0.1327241878263905 F F F<br>0.8333442011502470 0.3333376804600974 0.0000000000000000 F F F<br>0.8370666508760820 0.3325200237164087 0.2675156691237709 T T T<br>0.0000000000000000 0.8333442011502470 0.1327241878263905 F F F<br>0.1666688402300522 0.6666753609202019 0.0000000000000000 F F F<br>0.1682384953660707 0.6657422531856289 0.2668693001446428 T T T<br>0.3333376804600974 0.8333442011502470 0.1327241878263905 F F F<br>0.5000065206901496 0.6666753609202019 0.0000000000000000 F F F<br>0.5052701093050971 0.6787877062168362 0.2699831912187181 T T T<br>0.6666753609202019 0.8333442011502470 0.1327241878263905 F F F<br>0.8333442011502470 0.6666753609202019 0.0000000000000000 F F F<br>0.8316422634674623 0.6722791830677824 0.2718531665458864 T T T<br>0.5004362378249378 0.3370938205282430 0.2814299722078536 T T T<br>0.5541611275761397 0.4011228993214211 0.4148938352945832 T T T<br>0.6250873348672088 0.5361187029168978 0.4504383845656817 T T T<br>0.5113434879308497 0.3055159142455994 0.4709332760408088 T T T<br>0.6718237093054458 0.6408132326612567 0.3671943773933193 T T T |

|                     |                     |                    |                          |
|---------------------|---------------------|--------------------|--------------------------|
| CHO-H<br>Rh/Cu(111) | Cu Rh C O H         |                    |                          |
|                     | 1.000000000000000   |                    |                          |
|                     | 7.6679000000000004  | 0.0000000000000000 | 0.0000000000000000       |
|                     | -3.8339499999999997 | 6.6405961900000001 | 0.0000000000000000       |
|                     | 0.0000000000000000  | 0.0000000000000000 | 19.173899999999997       |
|                     | Cu Rh C O H         |                    |                          |
|                     | 26                  | 1                  | 1 1 2                    |
|                     | Selective dynamics  |                    |                          |
|                     | Direct              |                    |                          |
|                     | 0.2978193635255131  | 0.1484209445161431 | 0.2194004896105813 T T T |
|                     | 0.0740787133764584  | 0.0370448665995440 | 0.0000000000000000 F F F |
|                     | 0.1852133131750904  | 0.2593140661968150 | 0.1088458790334812 F F F |
|                     | 0.6301818625318580  | 0.1445537483333986 | 0.2194983324547248 T T T |
|                     | 0.4074163938365558  | 0.0370448665995440 | 0.0000000000000000 F F F |
|                     | 0.5185509936351949  | 0.2593140661968150 | 0.1088458790334812 F F F |
|                     | 0.9656443402095788  | 0.1495116957595177 | 0.2189673928392105 T T T |
|                     | 0.7407540742966533  | 0.0370448665995440 | 0.0000000000000000 F F F |
|                     | 0.8518886740952922  | 0.2593140661968150 | 0.1088458790334812 F F F |
|                     | 0.2978533273329774  | 0.4828323885942373 | 0.2193896433428265 T T T |
|                     | 0.0740364784000534  | 0.3702980771068383 | 0.0000000000000000 F F F |
|                     | 0.1851710781987053  | 0.5925672767041092 | 0.1088458790334812 F F F |
|                     | 0.4073741588601507  | 0.3702980771068383 | 0.0000000000000000 F F F |
|                     | 0.5185087586587898  | 0.5925672767041092 | 0.1088458790334812 F F F |
|                     | 0.9713684640272652  | 0.4804592921539768 | 0.2183234220324685 T T T |
|                     | 0.7407118393202556  | 0.3702980771068383 | 0.0000000000000000 F F F |
|                     | 0.8518464391188871  | 0.5925672767041092 | 0.1088458790334812 F F F |
|                     | 0.2923203124198593  | 0.8128705761812917 | 0.2249462146875023 T T T |
|                     | 0.0740695378679563  | 0.7037018765027483 | 0.0000000000000000 F F F |
|                     | 0.1852041376666221  | 0.9259710761000194 | 0.1088458790334812 F F F |
|                     | 0.6301521373731900  | 0.8189654608043373 | 0.2195005112210197 T T T |
|                     | 0.4074072183280864  | 0.7037018765027483 | 0.0000000000000000 F F F |
|                     | 0.5185418181267442  | 0.9259710761000194 | 0.1088458790334812 F F F |
|                     | 0.9713420834385375  | 0.8243152385567666 | 0.2182761858547327 T T T |
|                     | 0.7407448987881580  | 0.7037018765027483 | 0.0000000000000000 F F F |
|                     | 0.8518794985868486  | 0.9259710761000194 | 0.1088458790334812 F F F |
|                     | 0.6357183806447966  | 0.4845403076450009 | 0.2295717190031097 T T T |
|                     | 0.7523753730175722  | 0.5428918773091527 | 0.3219957554899999 T T T |
|                     | 0.9301950461989815  | 0.6318523592787176 | 0.3464488076632715 T T T |
|                     | 0.6342302186334117  | 0.4837780325242459 | 0.3628559475597394 T T T |
|                     | 1.0627061022933793  | 0.6980753845083117 | 0.2886713676211280 T T T |



|                     |                                                                                                                                                                                                                                                                                                                                                                                                                                                                                                                                                                                                                                                                                                                                                                                                                                                                                                                                                                                                                                                                                                                                                                                                                                                                                                                                                                                                                                                                                                                                                                                                                                                                                                                                                                                                                                                                                                                                                                                                                                                                                                                            |
|---------------------|----------------------------------------------------------------------------------------------------------------------------------------------------------------------------------------------------------------------------------------------------------------------------------------------------------------------------------------------------------------------------------------------------------------------------------------------------------------------------------------------------------------------------------------------------------------------------------------------------------------------------------------------------------------------------------------------------------------------------------------------------------------------------------------------------------------------------------------------------------------------------------------------------------------------------------------------------------------------------------------------------------------------------------------------------------------------------------------------------------------------------------------------------------------------------------------------------------------------------------------------------------------------------------------------------------------------------------------------------------------------------------------------------------------------------------------------------------------------------------------------------------------------------------------------------------------------------------------------------------------------------------------------------------------------------------------------------------------------------------------------------------------------------------------------------------------------------------------------------------------------------------------------------------------------------------------------------------------------------------------------------------------------------------------------------------------------------------------------------------------------------|
| H-CHO<br>Rh/Cu(100) | Cu Rh C O H                                                                                                                                                                                                                                                                                                                                                                                                                                                                                                                                                                                                                                                                                                                                                                                                                                                                                                                                                                                                                                                                                                                                                                                                                                                                                                                                                                                                                                                                                                                                                                                                                                                                                                                                                                                                                                                                                                                                                                                                                                                                                                                |
|                     | 1.0000000000000000<br>7.6679000000000004 0.0000000000000000 0.0000000000000000<br>0.0000000000000000 7.6679000000000004 0.0000000000000000<br>0.0000000000000000 0.0000000000000000 13.6146999999999991                                                                                                                                                                                                                                                                                                                                                                                                                                                                                                                                                                                                                                                                                                                                                                                                                                                                                                                                                                                                                                                                                                                                                                                                                                                                                                                                                                                                                                                                                                                                                                                                                                                                                                                                                                                                                                                                                                                    |
|                     | Cu Rh C O H<br>26 1 1 1 2                                                                                                                                                                                                                                                                                                                                                                                                                                                                                                                                                                                                                                                                                                                                                                                                                                                                                                                                                                                                                                                                                                                                                                                                                                                                                                                                                                                                                                                                                                                                                                                                                                                                                                                                                                                                                                                                                                                                                                                                                                                                                                  |
|                     | Selective dynamics                                                                                                                                                                                                                                                                                                                                                                                                                                                                                                                                                                                                                                                                                                                                                                                                                                                                                                                                                                                                                                                                                                                                                                                                                                                                                                                                                                                                                                                                                                                                                                                                                                                                                                                                                                                                                                                                                                                                                                                                                                                                                                         |
|                     | Direct                                                                                                                                                                                                                                                                                                                                                                                                                                                                                                                                                                                                                                                                                                                                                                                                                                                                                                                                                                                                                                                                                                                                                                                                                                                                                                                                                                                                                                                                                                                                                                                                                                                                                                                                                                                                                                                                                                                                                                                                                                                                                                                     |
|                     | 0.0000000000000000 0.1666688402300522 0.1327241878263905 F F F<br>0.1666688402300522 0.0000000000000000 0.0000000000000000 F F F<br>0.1684152832953667 0.0008061716059304 0.2675741243213036 T T T<br>0.3333376804600974 0.1666688402300522 0.1327241878263905 F F F<br>0.5000065206901496 0.0000000000000000 0.0000000000000000 F F F<br>0.5028659243067670 0.0043724056950970 0.2677546749303834 T T T<br>0.6666753609202019 0.1666688402300522 0.1327241878263905 F F F<br>0.8333442011502470 0.0000000000000000 0.0000000000000000 F F F<br>0.8344202575132761 0.9982798745065422 0.2673405168683110 T T T<br>0.0000000000000000 0.5000065206901496 0.1327241878263905 F F F<br>0.1666688402300522 0.3333376804600974 0.0000000000000000 F F F<br>0.1552402565050496 0.3329386098781406 0.2671418041747037 T T T<br>0.3333376804600974 0.5000065206901496 0.1327241878263905 F F F<br>0.5000065206901496 0.3333376804600974 0.0000000000000000 F F F<br>0.6666753609202019 0.5000065206901496 0.1327241878263905 F F F<br>0.8333442011502470 0.3333376804600974 0.0000000000000000 F F F<br>0.8308314534667792 0.3321627073595759 0.2684576543429972 T T T<br>0.0000000000000000 0.8333442011502470 0.1327241878263905 F F F<br>0.1666688402300522 0.6666753609202019 0.0000000000000000 F F F<br>0.1655595791619185 0.6672150363387704 0.2661127075774832 T T T<br>0.3333376804600974 0.8333442011502470 0.1327241878263905 F F F<br>0.5000065206901496 0.6666753609202019 0.0000000000000000 F F F<br>0.5038671212919299 0.6835678589511985 0.2738662955161723 T T T<br>0.6666753609202019 0.8333442011502470 0.1327241878263905 F F F<br>0.8333442011502470 0.6666753609202019 0.0000000000000000 F F F<br>0.8376113221846809 0.6679909063742212 0.2668062794542590 T T T<br>0.4906754026805807 0.3362026094091212 0.2814133727062482 T T T<br>0.4737908465853100 0.4422947169753852 0.4163249528891280 T T T<br>0.4749884464504189 0.6061554465330242 0.4249316500334164 T T T<br>0.4217427937812114 0.3635587222380645 0.4773831136022190 T T T<br>0.6237223387914148 0.3703532874765808 0.3830058471764241 T T T |

|                     |                     |                    |                          |
|---------------------|---------------------|--------------------|--------------------------|
| H-CHO<br>Rh/Cu(111) | Cu Rh C O H         |                    |                          |
|                     | 1.000000000000000   |                    |                          |
|                     | 7.6679000000000004  | 0.0000000000000000 | 0.0000000000000000       |
|                     | -3.8339499999999997 | 6.6405961900000001 | 0.0000000000000000       |
|                     | 0.0000000000000000  | 0.0000000000000000 | 19.173899999999997       |
|                     | Cu Rh C O H         |                    |                          |
|                     | 26                  | 1                  | 1 1 2                    |
|                     | Selective dynamics  |                    |                          |
|                     | Direct              |                    |                          |
|                     | 0.2916477014684471  | 0.1431512032330332 | 0.2192069640865622 T T T |
|                     | 0.0740787133764584  | 0.0370448665995440 | 0.0000000000000000 F F F |
|                     | 0.1852133131750904  | 0.2593140661968150 | 0.1088458790334812 F F F |
|                     | 0.6295490834826130  | 0.1418580240838938 | 0.2196734457763097 T T T |
|                     | 0.4074163938365558  | 0.0370448665995440 | 0.0000000000000000 F F F |
|                     | 0.5185509936351949  | 0.2593140661968150 | 0.1088458790334812 F F F |
|                     | 0.9624809199342845  | 0.1465594845187169 | 0.2191916030259570 T T T |
|                     | 0.7407540742966533  | 0.0370448665995440 | 0.0000000000000000 F F F |
|                     | 0.8518886740952922  | 0.2593140661968150 | 0.1088458790334812 F F F |
|                     | 0.2923362237630735  | 0.4802504180184773 | 0.2201857514651941 T T T |
|                     | 0.0740364784000534  | 0.3702980771068383 | 0.0000000000000000 F F F |
|                     | 0.1851710781987035  | 0.5925672767041092 | 0.1088458790334812 F F F |
|                     | 0.4073741588601507  | 0.3702980771068383 | 0.0000000000000000 F F F |
|                     | 0.5185087586587898  | 0.5925672767041092 | 0.1088458790334812 F F F |
|                     | 0.9677047075845268  | 0.4813165896753091 | 0.2186065055915736 T T T |
|                     | 0.7407118393202556  | 0.3702980771068383 | 0.0000000000000000 F F F |
|                     | 0.8518464391188871  | 0.5925672767041092 | 0.1088458790334812 F F F |
|                     | 0.2964299521690107  | 0.8140402489180127 | 0.2194500621277913 T T T |
|                     | 0.0740695378679563  | 0.7037018765027483 | 0.0000000000000000 F F F |
|                     | 0.1852041376666183  | 0.9259710761000194 | 0.1088458790334812 F F F |
|                     | 0.6296575048667835  | 0.8168260047525623 | 0.2194839351366393 T T T |
|                     | 0.4074072183280827  | 0.7037018765027483 | 0.0000000000000000 F F F |
|                     | 0.5185418181267368  | 0.9259710761000194 | 0.1088458790334812 F F F |
|                     | 0.9670216047786643  | 0.8176983044206311 | 0.2186744205994062 T T T |
|                     | 0.7407448987881580  | 0.7037018765027483 | 0.0000000000000000 F F F |
|                     | 0.8518794985868413  | 0.9259710761000194 | 0.1088458790334812 F F F |
|                     | 0.6286990243119116  | 0.4794847140010932 | 0.2297194565559612 T T T |
|                     | 0.6817553454179254  | 0.4655927812359932 | 0.3371991925404834 T T T |
|                     | 0.6836845548766028  | 0.3227230809347076 | 0.3650205876283737 T T T |
|                     | 0.7513007553625276  | 0.6148178574344223 | 0.3626029495441579 T T T |
|                     | 0.5040312052706331  | 0.4255293542788682 | 0.3067636990885446 T T T |

|                     |                    |                     |                    |       |
|---------------------|--------------------|---------------------|--------------------|-------|
| CH-CO<br>Rh/Cu(100) | Cu Rh C O H        |                     |                    |       |
|                     | 1.000000000000000  |                     |                    |       |
|                     | 7.6679000000000004 | 0.000000000000000   | 0.000000000000000  |       |
|                     | 0.000000000000000  | 7.6679000000000004  | 0.000000000000000  |       |
|                     | 0.000000000000000  | 0.000000000000000   | 13.614699999999991 |       |
|                     | Cu Rh C O H        |                     |                    |       |
|                     | 26                 | 1                   | 2                  | 1 1   |
|                     | Selective dynamics |                     |                    |       |
|                     | Direct             |                     |                    |       |
|                     | 0.000000000000000  | 0.1666688402300522  | 0.1327241878263905 | F F F |
|                     | 0.1666688402300522 | 0.000000000000000   | 0.000000000000000  | F F F |
|                     | 0.1671952635063078 | 0.9979778119573324  | 0.2679446262089631 | T T T |
|                     | 0.3333376804600974 | 0.1666688402300522  | 0.1327241878263905 | F F F |
|                     | 0.5000065206901496 | 0.000000000000000   | 0.000000000000000  | F F F |
|                     | 0.5014675515829128 | 1.0014528970732341  | 0.2669427340857604 | T T T |
|                     | 0.6666753609202019 | 0.1666688402300522  | 0.1327241878263905 | F F F |
|                     | 0.8333442011502470 | 0.000000000000000   | 0.000000000000000  | F F F |
|                     | 0.8336804874871456 | -0.0006652582511616 | 0.2678619088468677 | T T T |
|                     | 0.000000000000000  | 0.5000065206901496  | 0.1327241878263905 | F F F |
|                     | 0.1666688402300522 | 0.3333376804600974  | 0.000000000000000  | F F F |
|                     | 0.1583507299610480 | 0.3324003259480166  | 0.2683208397956156 | T T T |
|                     | 0.3333376804600974 | 0.5000065206901496  | 0.1327241878263905 | F F F |
|                     | 0.5000065206901496 | 0.3333376804600974  | 0.000000000000000  | F F F |
|                     | 0.6666753609202019 | 0.5000065206901496  | 0.1327241878263905 | F F F |
|                     | 0.8333442011502470 | 0.3333376804600974  | 0.000000000000000  | F F F |
|                     | 0.8329084928983423 | 0.3317190947667890  | 0.2668745654225324 | T T T |
|                     | 0.000000000000000  | 0.8333442011502470  | 0.1327241878263905 | F F F |
|                     | 0.1666688402300522 | 0.6666753609202019  | 0.000000000000000  | F F F |
|                     | 0.1665274917730213 | 0.6669012927512878  | 0.2662362758824260 | T T T |
|                     | 0.3333376804600974 | 0.8333442011502470  | 0.1327241878263905 | F F F |
|                     | 0.5000065206901496 | 0.6666753609202019  | 0.000000000000000  | F F F |
|                     | 0.5008969765105685 | 0.6755955086026560  | 0.2692616572744537 | T T T |
|                     | 0.6666753609202019 | 0.8333442011502470  | 0.1327241878263905 | F F F |
|                     | 0.8333442011502470 | 0.6666753609202019  | 0.000000000000000  | F F F |
|                     | 0.8352013872333144 | 0.6665568019559042  | 0.2678304823857542 | T T T |
|                     | 0.4948051803432921 | 0.3390082734384156  | 0.2800098672541489 | T T T |
|                     | 0.4459005792557819 | 0.4094700931738891  | 0.4199593383750927 | T T T |
|                     | 0.5496441006568425 | 0.3171083299106701  | 0.4773203036914564 | T T T |
|                     | 0.6450646553514275 | 0.2320995702411645  | 0.5259243998360168 | T T T |
|                     | 0.3503307393425514 | 0.4978325124036923  | 0.4507539348628994 | T T T |

|                     |                     |                    |                          |
|---------------------|---------------------|--------------------|--------------------------|
| CH-CO<br>Rh/Cu(111) | Cu Rh C O H         |                    |                          |
|                     | 1.000000000000000   |                    |                          |
|                     | 7.6679000000000004  | 0.0000000000000000 | 0.0000000000000000       |
|                     | -3.8339499999999997 | 6.6405961900000001 | 0.0000000000000000       |
|                     | 0.0000000000000000  | 0.0000000000000000 | 19.173899999999997       |
|                     | Cu Rh C O H         |                    |                          |
|                     | 26                  | 1                  | 2 1 1                    |
|                     | Selective dynamics  |                    |                          |
|                     | Direct              |                    |                          |
|                     | 0.2917644298212557  | 0.1428036056058299 | 0.2186979675595609 T T T |
|                     | 0.0740787133764584  | 0.0370448665995440 | 0.0000000000000000 F F F |
|                     | 0.1852133131750904  | 0.2593140661968150 | 0.1088458790334812 F F F |
|                     | 0.6289463711875561  | 0.1470035267200740 | 0.2182093773073126 T T T |
|                     | 0.4074163938365558  | 0.0370448665995440 | 0.0000000000000000 F F F |
|                     | 0.5185509936351949  | 0.2593140661968150 | 0.1088458790334812 F F F |
|                     | 0.9617691963254605  | 0.1493718222782142 | 0.2171157399076920 T T T |
|                     | 0.7407540742966533  | 0.0370448665995440 | 0.0000000000000000 F F F |
|                     | 0.8518886740952922  | 0.2593140661968150 | 0.1088458790334812 F F F |
|                     | 0.2830550607374983  | 0.4773204513391217 | 0.2225222114931461 T T T |
|                     | 0.0740364784000534  | 0.3702980771068383 | 0.0000000000000000 F F F |
|                     | 0.1851710781987087  | 0.5925672767041092 | 0.1088458790334812 F F F |
|                     | 0.4073741588601507  | 0.3702980771068383 | 0.0000000000000000 F F F |
|                     | 0.5185087586587898  | 0.5925672767041092 | 0.1088458790334812 F F F |
|                     | 0.9641097836141421  | 0.4821588311065779 | 0.2181978758885603 T T T |
|                     | 0.7407118393202556  | 0.3702980771068383 | 0.0000000000000000 F F F |
|                     | 0.8518464391188871  | 0.5925672767041092 | 0.1088458790334812 F F F |
|                     | 0.2954852124018955  | 0.8156039264098018 | 0.2204117929367941 T T T |
|                     | 0.0740695378679563  | 0.7037018765027483 | 0.0000000000000000 F F F |
|                     | 0.1852041376666293  | 0.9259710761000194 | 0.1088458790334812 F F F |
|                     | 0.6337569099322941  | 0.8280289781852372 | 0.2225460129660767 T T T |
|                     | 0.4074072183280932  | 0.7037018765027483 | 0.0000000000000000 F F F |
|                     | 0.5185418181267578  | 0.9259710761000194 | 0.1088458790334812 F F F |
|                     | 0.9682900414275631  | 0.8193182959843446 | 0.2187003243338154 T T T |
|                     | 0.7407448987881580  | 0.7037018765027483 | 0.0000000000000000 F F F |
|                     | 0.8518794985868623  | 0.9259710761000194 | 0.1088458790334812 F F F |
|                     | 0.6303387823509053  | 0.4807771077936908 | 0.2305571121878063 T T T |
|                     | 0.7230466701247933  | 0.3885918921048661 | 0.3680730688425499 T T T |
|                     | 0.5104132895253209  | 0.6006114191492643 | 0.2855009551665325 T T T |
|                     | 0.8020143841831298  | 0.3164065301747129 | 0.3969553530648990 T T T |
|                     | 0.5029447579642303  | 0.6077776211292120 | 0.3423632940247844 T T T |

|                      |                                                                                                                                                                                                                                                                                                                                                                                                                                                                                                                                                                                                                                                                                                                                                                                                                                                                                                                                                                                                                                                                                                                                                                                                                                                                                                                                                                                                                                                                                                                                                                                                                                                                                                                                                                                                                                                                                                                                                                                                                                                                                                                                                                                              |
|----------------------|----------------------------------------------------------------------------------------------------------------------------------------------------------------------------------------------------------------------------------------------------------------------------------------------------------------------------------------------------------------------------------------------------------------------------------------------------------------------------------------------------------------------------------------------------------------------------------------------------------------------------------------------------------------------------------------------------------------------------------------------------------------------------------------------------------------------------------------------------------------------------------------------------------------------------------------------------------------------------------------------------------------------------------------------------------------------------------------------------------------------------------------------------------------------------------------------------------------------------------------------------------------------------------------------------------------------------------------------------------------------------------------------------------------------------------------------------------------------------------------------------------------------------------------------------------------------------------------------------------------------------------------------------------------------------------------------------------------------------------------------------------------------------------------------------------------------------------------------------------------------------------------------------------------------------------------------------------------------------------------------------------------------------------------------------------------------------------------------------------------------------------------------------------------------------------------------|
| CH-CHO<br>Rh/Cu(100) | Cu Rh C O H                                                                                                                                                                                                                                                                                                                                                                                                                                                                                                                                                                                                                                                                                                                                                                                                                                                                                                                                                                                                                                                                                                                                                                                                                                                                                                                                                                                                                                                                                                                                                                                                                                                                                                                                                                                                                                                                                                                                                                                                                                                                                                                                                                                  |
|                      | 1.0000000000000000<br>7.6679000000000004 0.0000000000000000 0.0000000000000000<br>0.0000000000000000 7.6679000000000004 0.0000000000000000<br>0.0000000000000000 0.0000000000000000 13.6146999999999991                                                                                                                                                                                                                                                                                                                                                                                                                                                                                                                                                                                                                                                                                                                                                                                                                                                                                                                                                                                                                                                                                                                                                                                                                                                                                                                                                                                                                                                                                                                                                                                                                                                                                                                                                                                                                                                                                                                                                                                      |
|                      | Cu Rh C O H                                                                                                                                                                                                                                                                                                                                                                                                                                                                                                                                                                                                                                                                                                                                                                                                                                                                                                                                                                                                                                                                                                                                                                                                                                                                                                                                                                                                                                                                                                                                                                                                                                                                                                                                                                                                                                                                                                                                                                                                                                                                                                                                                                                  |
|                      | 26 1 2 1 2                                                                                                                                                                                                                                                                                                                                                                                                                                                                                                                                                                                                                                                                                                                                                                                                                                                                                                                                                                                                                                                                                                                                                                                                                                                                                                                                                                                                                                                                                                                                                                                                                                                                                                                                                                                                                                                                                                                                                                                                                                                                                                                                                                                   |
|                      | Selective dynamics                                                                                                                                                                                                                                                                                                                                                                                                                                                                                                                                                                                                                                                                                                                                                                                                                                                                                                                                                                                                                                                                                                                                                                                                                                                                                                                                                                                                                                                                                                                                                                                                                                                                                                                                                                                                                                                                                                                                                                                                                                                                                                                                                                           |
|                      | Direct                                                                                                                                                                                                                                                                                                                                                                                                                                                                                                                                                                                                                                                                                                                                                                                                                                                                                                                                                                                                                                                                                                                                                                                                                                                                                                                                                                                                                                                                                                                                                                                                                                                                                                                                                                                                                                                                                                                                                                                                                                                                                                                                                                                       |
|                      | 0.0000000000000000 0.1666688402300522 0.1327241878263905 F F F<br>0.1666688402300522 0.0000000000000000 0.0000000000000000 F F F<br>0.1678507044590584 0.9989037540191672 0.2666330582869185 T T T<br>0.3333376804600974 0.1666688402300522 0.1327241878263905 F F F<br>0.5000065206901496 0.0000000000000000 0.0000000000000000 F F F<br>0.5064105384843700 0.9892740019079242 0.2739306227589128 T T T<br>0.6666753609202019 0.1666688402300522 0.1327241878263905 F F F<br>0.8333442011502470 0.0000000000000000 0.0000000000000000 F F F<br>0.8326609585979043 1.0001668313290188 0.2733342417799238 T T T<br>0.0000000000000000 0.5000065206901496 0.1327241878263905 F F F<br>0.1666688402300522 0.3333376804600974 0.0000000000000000 F F F<br>0.1565855948894100 0.3335359267297258 0.2667599476078317 T T T<br>0.3333376804600974 0.5000065206901496 0.1327241878263905 F F F<br>0.5000065206901496 0.3333376804600974 0.0000000000000000 F F F<br>0.6666753609202019 0.5000065206901496 0.1327241878263905 F F F<br>0.8333442011502470 0.3333376804600974 0.0000000000000000 F F F<br>0.8319888016435236 0.3329825995373215 0.2744535259282869 T T T<br>0.0000000000000000 0.8333442011502470 0.1327241878263905 F F F<br>0.1666688402300522 0.6666753609202019 0.0000000000000000 F F F<br>0.1678700345856424 0.6656161241201158 0.2674842085079404 T T T<br>0.3333376804600974 0.8333442011502470 0.1327241878263905 F F F<br>0.5000065206901496 0.6666753609202019 0.0000000000000000 F F F<br>0.5009748594541300 0.6670089064788806 0.2666737396625992 T T T<br>0.6666753609202019 0.8333442011502470 0.1327241878263905 F F F<br>0.8333442011502470 0.6666753609202019 0.0000000000000000 F F F<br>0.8332385782384847 0.6662566001351720 0.2671060161279429 T T T<br>0.4920328037864525 0.3343972164748001 0.2788386965559269 T T T<br>0.4819076397751986 0.2550004733691750 0.4260242186238092 T T T<br>0.6597131510136700 0.1686430889798982 0.3516517987418622 T T T<br>0.3612594538614525 0.1598019141286745 0.4526537856628455 T T T<br>0.5355417471670706 0.3570642317342111 0.4748551222599093 T T T<br>0.7239028683836815 0.1468750472592944 0.4231165131976112 T T T |

|                      |                                                                                                                                                                                                                                                                                                                                                                                                                                                                                                                                                                                                                                                                                                                                                                                                                                                                                                                                                                                                                                                                                                                                                                                                                                                                                                                                                                                                                                                                                                                                                                                                                                                                                                                                                                                                                                                                                                                                                                                                                                                                                                                                                                                                                                                                                                                                                                                                                                                                         |
|----------------------|-------------------------------------------------------------------------------------------------------------------------------------------------------------------------------------------------------------------------------------------------------------------------------------------------------------------------------------------------------------------------------------------------------------------------------------------------------------------------------------------------------------------------------------------------------------------------------------------------------------------------------------------------------------------------------------------------------------------------------------------------------------------------------------------------------------------------------------------------------------------------------------------------------------------------------------------------------------------------------------------------------------------------------------------------------------------------------------------------------------------------------------------------------------------------------------------------------------------------------------------------------------------------------------------------------------------------------------------------------------------------------------------------------------------------------------------------------------------------------------------------------------------------------------------------------------------------------------------------------------------------------------------------------------------------------------------------------------------------------------------------------------------------------------------------------------------------------------------------------------------------------------------------------------------------------------------------------------------------------------------------------------------------------------------------------------------------------------------------------------------------------------------------------------------------------------------------------------------------------------------------------------------------------------------------------------------------------------------------------------------------------------------------------------------------------------------------------------------------|
| CH-CHO<br>Rh/Cu(111) | Cu Rh C O H                                                                                                                                                                                                                                                                                                                                                                                                                                                                                                                                                                                                                                                                                                                                                                                                                                                                                                                                                                                                                                                                                                                                                                                                                                                                                                                                                                                                                                                                                                                                                                                                                                                                                                                                                                                                                                                                                                                                                                                                                                                                                                                                                                                                                                                                                                                                                                                                                                                             |
|                      | 1.0000000000000000<br>7.6679000000000004 0.0000000000000000 0.0000000000000000<br>-3.8339499999999997 6.6405961900000001 0.0000000000000000<br>0.0000000000000000 0.0000000000000000 19.1738999999999997<br>Cu Rh C O H<br>26 1 2 1 2<br>Selective dynamics<br>Direct<br>0.2933552108166868 0.1360833417425265 0.2247640804508569 T T T<br>0.0740787133764584 0.0370448665995440 0.0000000000000000 F F F<br>0.1852133131750904 0.2593140661968150 0.1088458790334812 F F F<br>0.6357716527058053 0.1470698999987495 0.2173047561601521 T T T<br>0.4074163938365558 0.0370448665995440 0.0000000000000000 F F F<br>0.5185509936351949 0.2593140661968150 0.1088458790334812 F F F<br>0.9613568015581880 0.1468946268338404 0.2164443640829087 T T T<br>0.7407540742966532 0.0370448665995440 0.0000000000000000 F F F<br>0.8518886740952922 0.2593140661968150 0.1088458790334812 F F F<br>0.2832661695477431 0.4764324871246303 0.2223813846638039 T T T<br>0.0740364784000533 0.3702980771068383 0.0000000000000000 F F F<br>0.1851710781986924 0.5925672767041092 0.1088458790334812 F F F<br>0.4073741588601507 0.3702980771068383 0.0000000000000000 F F F<br>0.5185087586587898 0.5925672767041092 0.1088458790334812 F F F<br>0.9629316262645713 0.4793975314027488 0.2193414083589994 T T T<br>0.7407118393202552 0.3702980771068383 0.0000000000000000 F F F<br>0.8518464391188871 0.5925672767041092 0.1088458790334812 F F F<br>0.2890219030074151 0.8139048874312393 0.2260902645424659 T T T<br>0.0740695378679561 0.7037018765027483 0.0000000000000000 F F F<br>0.1852041376665952 0.9259710761000193 0.1088458790334812 F F F<br>0.6302557875572505 0.8216095055554501 0.2241801039984270 T T T<br>0.4074072183280606 0.7037018765027483 0.0000000000000000 F F F<br>0.5185418181266925 0.9259710761000193 0.1088458790334812 F F F<br>0.9633887978507187 0.8148124970641005 0.2168576477641587 T T T<br>0.7407448987881580 0.7037018765027483 0.0000000000000000 F F F<br>0.8518794985867970 0.9259710761000193 0.1088458790334812 F F F<br>0.6310714842781709 0.4783595906583590 0.2245062847451505 T T T<br>0.2968498685103555 -0.0068038064060595 0.3198479231722525 T T T<br>0.5125893488578087 0.5834188746745684 0.2852232905400172 T T T<br>0.4420477137767739 0.0135408011838681 0.3530490809107003 T T T<br>0.1634754442478549 -0.0243570856544696 0.3491619224382760 T T T<br>0.5041946334556034 0.5836989428682091 0.3423265180178124 T T T |

|                                   |                    |                    |                          |
|-----------------------------------|--------------------|--------------------|--------------------------|
| CH <sub>2</sub> -CO<br>Rh/Cu(100) | Cu Rh C O H        |                    |                          |
|                                   | 1.0000000000000000 |                    |                          |
|                                   | 7.6679000000000004 | 0.0000000000000000 | 0.0000000000000000       |
|                                   | 0.0000000000000000 | 7.6679000000000004 | 0.0000000000000000       |
|                                   | 0.0000000000000000 | 0.0000000000000000 | 13.6146999999999991      |
|                                   | Cu Rh C O H        |                    |                          |
|                                   | 26 1 2 1 2         |                    |                          |
|                                   | Selective dynamics |                    |                          |
|                                   | Direct             |                    |                          |
|                                   | 0.0000000000000000 | 0.1666688402300522 | 0.1327241878263905 F F F |
|                                   | 0.1666688402300522 | 0.0000000000000000 | 0.0000000000000000 F F F |
|                                   | 0.1641216286739189 | 0.9990569126257651 | 0.2667230268181398 T T T |
|                                   | 0.3333376804600975 | 0.1666688402300522 | 0.1327241878263905 F F F |
|                                   | 0.5000065206901496 | 0.0000000000000000 | 0.0000000000000000 F F F |
|                                   | 0.4997597481114557 | 0.9975619455779711 | 0.2745815368502597 T T T |
|                                   | 0.6666753609202019 | 0.1666688402300522 | 0.1327241878263905 F F F |
|                                   | 0.8333442011502470 | 0.0000000000000000 | 0.0000000000000000 F F F |
|                                   | 0.8355350600623496 | 0.9990139135983067 | 0.2667003863863386 T T T |
|                                   | 0.0000000000000000 | 0.5000065206901496 | 0.1327241878263905 F F F |
|                                   | 0.1666688402300522 | 0.3333376804600975 | 0.0000000000000000 F F F |
|                                   | 0.1620197700182390 | 0.3327316033974332 | 0.2673769782707808 T T T |
|                                   | 0.3333376804600975 | 0.5000065206901496 | 0.1327241878263905 F F F |
|                                   | 0.5000065206901496 | 0.3333376804600975 | 0.0000000000000000 F F F |
|                                   | 0.6666753609202019 | 0.5000065206901496 | 0.1327241878263905 F F F |
|                                   | 0.8333442011502470 | 0.3333376804600975 | 0.0000000000000000 F F F |
|                                   | 0.8385447995408311 | 0.3326893910537809 | 0.2673902031051026 T T T |
|                                   | 0.0000000000000000 | 0.8333442011502470 | 0.1327241878263905 F F F |
|                                   | 0.1666688402300522 | 0.6666753609202019 | 0.0000000000000000 F F F |
|                                   | 0.1665777674557072 | 0.6664885628588759 | 0.2670525224446734 T T T |
|                                   | 0.3333376804600975 | 0.8333442011502470 | 0.1327241878263905 F F F |
|                                   | 0.5000065206901496 | 0.6666753609202019 | 0.0000000000000000 F F F |
|                                   | 0.4999572168211384 | 0.6759596316459610 | 0.2676776272843401 T T T |
|                                   | 0.6666753609202019 | 0.8333442011502470 | 0.1327241878263905 F F F |
|                                   | 0.8333442011502470 | 0.6666753609202019 | 0.0000000000000000 F F F |
|                                   | 0.8333736889278769 | 0.6664577463909825 | 0.2670416069700274 T T T |
|                                   | 0.5003434573316358 | 0.3440946213338587 | 0.2887756463713047 T T T |
|                                   | 0.5014013087929517 | 0.3899416278200612 | 0.4222851497215980 T T T |
|                                   | 0.5001857855908085 | 0.1350306987980232 | 0.3989900169083057 T T T |
|                                   | 0.5023434460729592 | 0.4528435525934253 | 0.5010367747434831 T T T |
|                                   | 0.6173255911257577 | 0.1123919840124175 | 0.4425934729365420 T T T |
|                                   | 0.3830307475630007 | 0.1130631164410922 | 0.4426882460434521 T T T |

|                                   |                     |                    |                          |
|-----------------------------------|---------------------|--------------------|--------------------------|
| CH <sub>2</sub> -CO<br>Rh/Cu(111) | Cu Rh C O H         |                    |                          |
|                                   | 1.000000000000000   |                    |                          |
|                                   | 7.6679000000000004  | 0.0000000000000000 | 0.0000000000000000       |
|                                   | -3.8339499999999997 | 6.6405961900000001 | 0.0000000000000000       |
|                                   | 0.0000000000000000  | 0.0000000000000000 | 19.1738999999999997      |
|                                   | Cu Rh C O H         |                    |                          |
|                                   | 26                  | 1                  | 2 1 2                    |
|                                   | Selective dynamics  |                    |                          |
|                                   | Direct              |                    |                          |
|                                   | 0.2929398009604902  | 0.1416506689898734 | 0.2196069328532163 T T T |
|                                   | 0.0740787133764584  | 0.0370448665995440 | 0.0000000000000000 F F F |
|                                   | 0.1852133131750904  | 0.2593140661968150 | 0.1088458790334812 F F F |
|                                   | 0.6319899019543641  | 0.1396195082526158 | 0.2181967247789551 T T T |
|                                   | 0.4074163938365558  | 0.0370448665995440 | 0.0000000000000000 F F F |
|                                   | 0.5185509936351949  | 0.2593140661968150 | 0.1088458790334812 F F F |
|                                   | 0.9651196869421728  | 0.1454937397534956 | 0.2190129771509130 T T T |
|                                   | 0.7407540742966532  | 0.0370448665995440 | 0.0000000000000000 F F F |
|                                   | 0.8518886740952922  | 0.2593140661968150 | 0.1088458790334812 F F F |
|                                   | 0.2917785229901511  | 0.4778676871978562 | 0.2177012003600884 T T T |
|                                   | 0.0740364784000533  | 0.3702980771068383 | 0.0000000000000000 F F F |
|                                   | 0.1851710781986924  | 0.5925672767041092 | 0.1088458790334812 F F F |
|                                   | 0.4073741588601507  | 0.3702980771068383 | 0.0000000000000000 F F F |
|                                   | 0.5185087586587898  | 0.5925672767041092 | 0.1088458790334812 F F F |
|                                   | 0.9697031715791302  | 0.4777450428212976 | 0.2196047630661945 T T T |
|                                   | 0.7407118393202552  | 0.3702980771068383 | 0.0000000000000000 F F F |
|                                   | 0.8518464391188871  | 0.5925672767041092 | 0.1088458790334812 F F F |
|                                   | 0.2952927218199579  | 0.8127728050366346 | 0.2193926558625919 T T T |
|                                   | 0.0740695378679561  | 0.7037018765027483 | 0.0000000000000000 F F F |
|                                   | 0.1852041376665952  | 0.9259710761000193 | 0.1088458790334812 F F F |
|                                   | 0.6258677174047890  | 0.8135559008724911 | 0.2234484326695111 T T T |
|                                   | 0.4074072183280606  | 0.7037018765027483 | 0.0000000000000000 F F F |
|                                   | 0.5185418181266925  | 0.9259710761000193 | 0.1088458790334812 F F F |
|                                   | 0.9706662707301489  | 0.8172693323531852 | 0.2178907001760759 T T T |
|                                   | 0.7407448987881580  | 0.7037018765027483 | 0.0000000000000000 F F F |
|                                   | 0.8518794985867970  | 0.9259710761000193 | 0.1088458790334812 F F F |
|                                   | 0.6339322200124125  | 0.4746916567997623 | 0.2310709928836053 T T T |
|                                   | 0.6445055228724674  | 0.4307573388818906 | 0.3261268092170815 T T T |
|                                   | 0.5878762770382601  | 0.6498961416151139 | 0.3113961393544273 T T T |
|                                   | 0.6591096491483677  | 0.3721342615364397 | 0.3812551722031434 T T T |
|                                   | 0.4456680459676520  | 0.5810756095825345 | 0.3399017771426433 T T T |
|                                   | 0.7108148334996569  | 0.7542927848311111 | 0.3450461744426866 T T T |



|                                    |                                                                                                                                                                                                                                                                                                                                                                                                                                                                                                                                                                                                                                                                                                                                                                                                                                                                                                                                                                                                                                                                                                                                                                                                                                                                                                                                                                                                                                                                                                                                                                                                                                                                                                                                                                                                                                                                                                                                                                                                                                                                                                                                                                                                                                                                 |
|------------------------------------|-----------------------------------------------------------------------------------------------------------------------------------------------------------------------------------------------------------------------------------------------------------------------------------------------------------------------------------------------------------------------------------------------------------------------------------------------------------------------------------------------------------------------------------------------------------------------------------------------------------------------------------------------------------------------------------------------------------------------------------------------------------------------------------------------------------------------------------------------------------------------------------------------------------------------------------------------------------------------------------------------------------------------------------------------------------------------------------------------------------------------------------------------------------------------------------------------------------------------------------------------------------------------------------------------------------------------------------------------------------------------------------------------------------------------------------------------------------------------------------------------------------------------------------------------------------------------------------------------------------------------------------------------------------------------------------------------------------------------------------------------------------------------------------------------------------------------------------------------------------------------------------------------------------------------------------------------------------------------------------------------------------------------------------------------------------------------------------------------------------------------------------------------------------------------------------------------------------------------------------------------------------------|
| CH <sub>2</sub> -CHO<br>Rh/Cu(100) | Cu Rh C O H                                                                                                                                                                                                                                                                                                                                                                                                                                                                                                                                                                                                                                                                                                                                                                                                                                                                                                                                                                                                                                                                                                                                                                                                                                                                                                                                                                                                                                                                                                                                                                                                                                                                                                                                                                                                                                                                                                                                                                                                                                                                                                                                                                                                                                                     |
|                                    | 1.0000000000000000<br>7.6679000000000004 0.0000000000000000 0.0000000000000000<br>0.0000000000000000 7.6679000000000004 0.0000000000000000<br>0.0000000000000000 0.0000000000000000 13.6146999999999991                                                                                                                                                                                                                                                                                                                                                                                                                                                                                                                                                                                                                                                                                                                                                                                                                                                                                                                                                                                                                                                                                                                                                                                                                                                                                                                                                                                                                                                                                                                                                                                                                                                                                                                                                                                                                                                                                                                                                                                                                                                         |
|                                    | Cu Rh C O H                                                                                                                                                                                                                                                                                                                                                                                                                                                                                                                                                                                                                                                                                                                                                                                                                                                                                                                                                                                                                                                                                                                                                                                                                                                                                                                                                                                                                                                                                                                                                                                                                                                                                                                                                                                                                                                                                                                                                                                                                                                                                                                                                                                                                                                     |
|                                    | 26 1 2 1 3                                                                                                                                                                                                                                                                                                                                                                                                                                                                                                                                                                                                                                                                                                                                                                                                                                                                                                                                                                                                                                                                                                                                                                                                                                                                                                                                                                                                                                                                                                                                                                                                                                                                                                                                                                                                                                                                                                                                                                                                                                                                                                                                                                                                                                                      |
|                                    | Selective dynamics                                                                                                                                                                                                                                                                                                                                                                                                                                                                                                                                                                                                                                                                                                                                                                                                                                                                                                                                                                                                                                                                                                                                                                                                                                                                                                                                                                                                                                                                                                                                                                                                                                                                                                                                                                                                                                                                                                                                                                                                                                                                                                                                                                                                                                              |
|                                    | Direct                                                                                                                                                                                                                                                                                                                                                                                                                                                                                                                                                                                                                                                                                                                                                                                                                                                                                                                                                                                                                                                                                                                                                                                                                                                                                                                                                                                                                                                                                                                                                                                                                                                                                                                                                                                                                                                                                                                                                                                                                                                                                                                                                                                                                                                          |
|                                    | 0.0000000000000000 0.1666688402300522 0.1327241878263905 F F F<br>0.1666688402300522 0.0000000000000000 0.0000000000000000 F F F<br>0.1645705905348370 -0.0027805474124885 0.2672985110023742 T T T<br>0.3333376804600974 0.1666688402300522 0.1327241878263905 F F F<br>0.5000065206901496 0.0000000000000000 0.0000000000000000 F F F<br>0.4995059787363609 1.0033874235293341 0.2756246852008122 T T T<br>0.6666753609202019 0.1666688402300522 0.1327241878263905 F F F<br>0.8333442011502470 0.0000000000000000 0.0000000000000000 F F F<br>0.8354344230613302 0.9966878144292638 0.2667500188394225 T T T<br>0.0000000000000000 0.5000065206901496 0.1327241878263905 F F F<br>0.1666688402300522 0.3333376804600974 0.0000000000000000 F F F<br>0.1627615417589348 0.3312979120566903 0.2666948472108369 T T T<br>0.3333376804600974 0.5000065206901496 0.1327241878263905 F F F<br>0.5000065206901496 0.3333376804600974 0.0000000000000000 F F F<br>0.6666753609202019 0.5000065206901496 0.1327241878263905 F F F<br>0.8333442011502470 0.3333376804600974 0.0000000000000000 F F F<br>0.8384890250172715 0.3316789879166104 0.2667386007876009 T T T<br>0.0000000000000000 0.8333442011502470 0.1327241878263905 F F F<br>0.1666688402300522 0.6666753609202019 0.0000000000000000 F F F<br>0.1671357967416200 0.6652357047556708 0.2672282307504221 T T T<br>0.3333376804600974 0.8333442011502470 0.1327241878263905 F F F<br>0.5000065206901496 0.6666753609202019 0.0000000000000000 F F F<br>0.4992444704072967 0.6799939813137845 0.2676099994991176 T T T<br>0.6666753609202019 0.8333442011502470 0.1327241878263905 F F F<br>0.8333442011502470 0.6666753609202019 0.0000000000000000 F F F<br>0.8333204743753995 0.6660304926692149 0.2675363704053900 T T T<br>0.4995140763480409 0.3458526532480085 0.2865987881302020 T T T<br>0.5172879778059125 0.1533390908532798 0.3968178109015613 T T T<br>0.5090852367397649 0.4131787622930244 0.4318819896833035 T T T<br>0.6400703205774281 0.4745865764857979 0.4698181794535380 T T T<br>0.3797700159325150 0.4259661297136392 0.4673318149824417 T T T<br>0.6403215306671872 0.1286996632911142 0.4346382071667128 T T T<br>0.4070596419926401 0.1260262276052628 0.4454234359844547 T T T |

|                                    |                     |                    |                          |
|------------------------------------|---------------------|--------------------|--------------------------|
| CH <sub>2</sub> -CHO<br>Rh/Cu(111) | Cu Rh C O H         |                    |                          |
|                                    | 1.000000000000000   |                    |                          |
|                                    | 7.6679000000000004  | 0.0000000000000000 | 0.0000000000000000       |
|                                    | -3.8339499999999997 | 6.6405961900000001 | 0.0000000000000000       |
|                                    | 0.0000000000000000  | 0.0000000000000000 | 19.1738999999999997      |
|                                    | Cu Rh C O H         |                    |                          |
|                                    | 26                  | 1                  | 2 1 3                    |
|                                    | Selective dynamics  |                    |                          |
|                                    | Direct              |                    |                          |
|                                    | 0.2916499458379622  | 0.1403215869627138 | 0.2197578791524218 T T T |
|                                    | 0.0740787133764584  | 0.0370448665995440 | 0.0000000000000000 F F F |
|                                    | 0.1852133131750904  | 0.2593140661968150 | 0.1088458790334812 F F F |
|                                    | 0.6342073322201575  | 0.1404493100358201 | 0.2178988372831628 T T T |
|                                    | 0.4074163938365558  | 0.0370448665995440 | 0.0000000000000000 F F F |
|                                    | 0.5185509936351949  | 0.2593140661968150 | 0.1088458790334812 F F F |
|                                    | 0.9642297818488951  | 0.1450261603875212 | 0.2186018481143985 T T T |
|                                    | 0.7407540742966532  | 0.0370448665995440 | 0.0000000000000000 F F F |
|                                    | 0.8518886740952922  | 0.2593140661968150 | 0.1088458790334812 F F F |
|                                    | 0.2959452433175532  | 0.4839911945171803 | 0.2197672320640932 T T T |
|                                    | 0.0740364784000533  | 0.3702980771068383 | 0.0000000000000000 F F F |
|                                    | 0.1851710781986924  | 0.5925672767041092 | 0.1088458790334812 F F F |
|                                    | 0.4073741588601507  | 0.3702980771068383 | 0.0000000000000000 F F F |
|                                    | 0.5185087586587898  | 0.5925672767041092 | 0.1088458790334812 F F F |
|                                    | 0.9691084600916988  | 0.4773110241571921 | 0.2184858877573271 T T T |
|                                    | 0.7407118393202552  | 0.3702980771068383 | 0.0000000000000000 F F F |
|                                    | 0.8518464391188871  | 0.5925672767041092 | 0.1088458790334812 F F F |
|                                    | 0.2949086498858489  | 0.8141163667618212 | 0.2193112471904136 T T T |
|                                    | 0.0740695378679561  | 0.7037018765027483 | 0.0000000000000000 F F F |
|                                    | 0.1852041376665952  | 0.9259710761000193 | 0.1088458790334812 F F F |
|                                    | 0.6246815335668489  | 0.8128761931535756 | 0.2230417493113563 T T T |
|                                    | 0.4074072183280606  | 0.7037018765027483 | 0.0000000000000000 F F F |
|                                    | 0.5185418181266925  | 0.9259710761000193 | 0.1088458790334812 F F F |
|                                    | 0.9672385615337401  | 0.8151209342465934 | 0.2188141253424636 T T T |
|                                    | 0.7407448987881580  | 0.7037018765027483 | 0.0000000000000000 F F F |
|                                    | 0.8518794985867970  | 0.9259710761000193 | 0.1088458790334812 F F F |
|                                    | 0.6352862843180740  | 0.4751126520557985 | 0.2300132991157517 T T T |
|                                    | 0.5153859314703970  | 0.5930023252846173 | 0.3036853138975633 T T T |
|                                    | 0.6127642297537195  | 0.3974788198287869 | 0.3329432764398866 T T T |
|                                    | 0.4816142520688305  | 0.2315822815830968 | 0.3538873520550282 T T T |
|                                    | 0.7471256090912576  | 0.4928014503217042 | 0.3651438791171189 T T T |
|                                    | 0.6150619738325076  | 0.7153360151046978 | 0.3389042887078897 T T T |
|                                    | 0.3716216214854718  | 0.5025048093139943 | 0.3310227235939538 T T T |

|                                   |                    |                    |                    |       |
|-----------------------------------|--------------------|--------------------|--------------------|-------|
| CH <sub>3</sub> -CO<br>Rh/Cu(100) | Cu Rh C O H        |                    |                    |       |
|                                   | 1.000000000000000  |                    |                    |       |
|                                   | 7.6679000000000004 | 0.0000000000000000 | 0.0000000000000000 |       |
|                                   | 0.0000000000000000 | 7.6679000000000004 | 0.0000000000000000 |       |
|                                   | 0.0000000000000000 | 0.0000000000000000 | 13.614699999999991 |       |
|                                   | Cu Rh C O H        |                    |                    |       |
|                                   | 26                 | 1                  | 2                  | 1 3   |
|                                   | Selective dynamics |                    |                    |       |
|                                   | Direct             |                    |                    |       |
|                                   | 0.0000000000000000 | 0.1666688402300522 | 0.1327241878263905 | F F F |
|                                   | 0.1666688402300522 | 0.0000000000000000 | 0.0000000000000000 | F F F |
|                                   | 0.1656890817800558 | 0.9988250339121163 | 0.2667583374353464 | T T T |
|                                   | 0.3333376804600974 | 0.1666688402300522 | 0.1327241878263905 | F F F |
|                                   | 0.5000065206901496 | 0.0000000000000000 | 0.0000000000000000 | F F F |
|                                   | 0.4992878094265483 | 0.9952775610597624 | 0.2677197890039595 | T T T |
|                                   | 0.6666753609202019 | 0.1666688402300522 | 0.1327241878263905 | F F F |
|                                   | 0.8333442011502470 | 0.0000000000000000 | 0.0000000000000000 | F F F |
|                                   | 0.8327281681074119 | 0.9981667941051632 | 0.2671406258227206 | T T T |
|                                   | 0.0000000000000000 | 0.5000065206901496 | 0.1327241878263905 | F F F |
|                                   | 0.1666688402300522 | 0.3333376804600974 | 0.0000000000000000 | F F F |
|                                   | 0.1646299943371883 | 0.3332317114660285 | 0.2634849864083600 | T T T |
|                                   | 0.3333376804600974 | 0.5000065206901496 | 0.1327241878263905 | F F F |
|                                   | 0.5000065206901496 | 0.3333376804600974 | 0.0000000000000000 | F F F |
|                                   | 0.6666753609202019 | 0.5000065206901496 | 0.1327241878263905 | F F F |
|                                   | 0.8333442011502470 | 0.3333376804600974 | 0.0000000000000000 | F F F |
|                                   | 0.8405922845478023 | 0.3323984752405571 | 0.2658859990465423 | T T T |
|                                   | 0.0000000000000000 | 0.8333442011502470 | 0.1327241878263905 | F F F |
|                                   | 0.1666688402300522 | 0.6666753609202019 | 0.0000000000000000 | F F F |
|                                   | 0.1657078538585877 | 0.6671458765274383 | 0.2670985961870702 | T T T |
|                                   | 0.3333376804600974 | 0.8333442011502470 | 0.1327241878263905 | F F F |
|                                   | 0.5000065206901496 | 0.6666753609202019 | 0.0000000000000000 | F F F |
|                                   | 0.4983995620852750 | 0.6704439200581014 | 0.2682385126782127 | T T T |
|                                   | 0.6666753609202019 | 0.8333442011502470 | 0.1327241878263905 | F F F |
|                                   | 0.8333442011502470 | 0.6666753609202019 | 0.0000000000000000 | F F F |
|                                   | 0.8326258201155283 | 0.6681106745881799 | 0.2668858156293683 | T T T |
|                                   | 0.5059140569391583 | 0.3336290930357855 | 0.2956398305831931 | T T T |
|                                   | 0.6289988484271793 | 0.3446363375138709 | 0.4117626826040534 | T T T |
|                                   | 0.3933007713617906 | 0.3086011604003130 | 0.4597224678889323 | T T T |
|                                   | 0.7340840112846791 | 0.3560768246775630 | 0.4753380394465144 | T T T |
|                                   | 0.4163769301367274 | 0.1824084005211550 | 0.4937289874929841 | T T T |
|                                   | 0.2640076829420028 | 0.3117937080776001 | 0.4263979675016893 | T T T |
|                                   | 0.4052767731441043 | 0.4160561400989378 | 0.5113825698072140 | T T T |

|                                   |                     |                    |                          |
|-----------------------------------|---------------------|--------------------|--------------------------|
| CH <sub>3</sub> -CO<br>Rh/Cu(111) | Cu Rh C O H         |                    |                          |
|                                   | 1.000000000000000   |                    |                          |
|                                   | 7.6679000000000004  | 0.0000000000000000 | 0.0000000000000000       |
|                                   | -3.8339499999999997 | 6.6405961900000001 | 0.0000000000000000       |
|                                   | 0.0000000000000000  | 0.0000000000000000 | 19.173899999999997       |
|                                   | Cu Rh C O H         |                    |                          |
|                                   | 26 1 2 1 3          |                    |                          |
|                                   | Selective dynamics  |                    |                          |
|                                   | Direct              |                    |                          |
|                                   | 0.2936138210323846  | 0.1453970012812923 | 0.2190728228449227 T T T |
|                                   | 0.0740787133764584  | 0.0370448665995440 | 0.0000000000000000 F F F |
|                                   | 0.1852133131750904  | 0.2593140661968150 | 0.1088458790334812 F F F |
|                                   | 0.6307427159872550  | 0.1446897359378304 | 0.2173303811470113 T T T |
|                                   | 0.4074163938365558  | 0.0370448665995440 | 0.0000000000000000 F F F |
|                                   | 0.5185509936351949  | 0.2593140661968150 | 0.1088458790334812 F F F |
|                                   | 0.9646017136199716  | 0.1483501327061424 | 0.2192443683673307 T T T |
|                                   | 0.7407540742966533  | 0.0370448665995440 | 0.0000000000000000 F F F |
|                                   | 0.8518886740952922  | 0.2593140661968150 | 0.1088458790334812 F F F |
|                                   | 0.2926269611469469  | 0.4810091813221464 | 0.2183496556838626 T T T |
|                                   | 0.0740364784000534  | 0.3702980771068383 | 0.0000000000000000 F F F |
|                                   | 0.1851710781987040  | 0.5925672767041092 | 0.1088458790334812 F F F |
|                                   | 0.4073741588601507  | 0.3702980771068383 | 0.0000000000000000 F F F |
|                                   | 0.5185087586587898  | 0.5925672767041092 | 0.1088458790334812 F F F |
|                                   | 0.9675067674446804  | 0.4819032912412225 | 0.2190000011895216 T T T |
|                                   | 0.7407118393202556  | 0.3702980771068383 | 0.0000000000000000 F F F |
|                                   | 0.8518464391188871  | 0.5925672767041092 | 0.1088458790334812 F F F |
|                                   | 0.2964602851073976  | 0.8141234571385347 | 0.2191214315784319 T T T |
|                                   | 0.0740695378679563  | 0.7037018765027483 | 0.0000000000000000 F F F |
|                                   | 0.1852041376666194  | 0.9259710761000194 | 0.1088458790334812 F F F |
|                                   | 0.6311211482198269  | 0.8195354630977124 | 0.2155095514433380 T T T |
|                                   | 0.4074072183280837  | 0.7037018765027483 | 0.0000000000000000 F F F |
|                                   | 0.5185418181267388  | 0.9259710761000194 | 0.1088458790334812 F F F |
|                                   | 0.9682772100016931  | 0.8195127458924435 | 0.2185836292443174 T T T |
|                                   | 0.7407448987881580  | 0.7037018765027483 | 0.0000000000000000 F F F |
|                                   | 0.8518794985868433  | 0.9259710761000194 | 0.1088458790334812 F F F |
|                                   | 0.6311336801369650  | 0.4813922095352154 | 0.2395252566492124 T T T |
|                                   | 0.6347349767460125  | 0.3591590050259944 | 0.3225460536335066 T T T |
|                                   | 0.6248481377787501  | 0.5921362674631278 | 0.3572024356954979 T T T |
|                                   | 0.6381916538084745  | 0.2560674192126562 | 0.3679443378206115 T T T |
|                                   | 0.4887327301591800  | 0.5016025152434255 | 0.3873898008553007 T T T |
|                                   | 0.6202168299066443  | 0.7195020891624335 | 0.3340466429585208 T T T |
|                                   | 0.7614587598179197  | 0.6458158897131647 | 0.3878809939857432 T T T |

|                                    |                                                                                                                                                                                                                                                                                                                                                                                                                                                                                                                                                                                                                                                                                                                                                                                                                                                                                                                                                                                                                                                                                                                                                                                                                                                                                                                                                                                                                                                                                                                                                                                                                                                                                                                                                                                                                                                                                                                                                                                                                                                                                                                                                                                                                                                                                                                                   |
|------------------------------------|-----------------------------------------------------------------------------------------------------------------------------------------------------------------------------------------------------------------------------------------------------------------------------------------------------------------------------------------------------------------------------------------------------------------------------------------------------------------------------------------------------------------------------------------------------------------------------------------------------------------------------------------------------------------------------------------------------------------------------------------------------------------------------------------------------------------------------------------------------------------------------------------------------------------------------------------------------------------------------------------------------------------------------------------------------------------------------------------------------------------------------------------------------------------------------------------------------------------------------------------------------------------------------------------------------------------------------------------------------------------------------------------------------------------------------------------------------------------------------------------------------------------------------------------------------------------------------------------------------------------------------------------------------------------------------------------------------------------------------------------------------------------------------------------------------------------------------------------------------------------------------------------------------------------------------------------------------------------------------------------------------------------------------------------------------------------------------------------------------------------------------------------------------------------------------------------------------------------------------------------------------------------------------------------------------------------------------------|
| CH <sub>3</sub> -CHO<br>Rh/Cu(100) | Cu Rh C O H                                                                                                                                                                                                                                                                                                                                                                                                                                                                                                                                                                                                                                                                                                                                                                                                                                                                                                                                                                                                                                                                                                                                                                                                                                                                                                                                                                                                                                                                                                                                                                                                                                                                                                                                                                                                                                                                                                                                                                                                                                                                                                                                                                                                                                                                                                                       |
|                                    | 1.0000000000000000<br>7.6679000000000004 0.0000000000000000 0.0000000000000000<br>0.0000000000000000 7.6679000000000004 0.0000000000000000<br>0.0000000000000000 0.0000000000000000 13.6146999999999991                                                                                                                                                                                                                                                                                                                                                                                                                                                                                                                                                                                                                                                                                                                                                                                                                                                                                                                                                                                                                                                                                                                                                                                                                                                                                                                                                                                                                                                                                                                                                                                                                                                                                                                                                                                                                                                                                                                                                                                                                                                                                                                           |
|                                    | Cu Rh C O H                                                                                                                                                                                                                                                                                                                                                                                                                                                                                                                                                                                                                                                                                                                                                                                                                                                                                                                                                                                                                                                                                                                                                                                                                                                                                                                                                                                                                                                                                                                                                                                                                                                                                                                                                                                                                                                                                                                                                                                                                                                                                                                                                                                                                                                                                                                       |
|                                    | 26 1 2 1 4                                                                                                                                                                                                                                                                                                                                                                                                                                                                                                                                                                                                                                                                                                                                                                                                                                                                                                                                                                                                                                                                                                                                                                                                                                                                                                                                                                                                                                                                                                                                                                                                                                                                                                                                                                                                                                                                                                                                                                                                                                                                                                                                                                                                                                                                                                                        |
|                                    | Selective dynamics                                                                                                                                                                                                                                                                                                                                                                                                                                                                                                                                                                                                                                                                                                                                                                                                                                                                                                                                                                                                                                                                                                                                                                                                                                                                                                                                                                                                                                                                                                                                                                                                                                                                                                                                                                                                                                                                                                                                                                                                                                                                                                                                                                                                                                                                                                                |
|                                    | Direct                                                                                                                                                                                                                                                                                                                                                                                                                                                                                                                                                                                                                                                                                                                                                                                                                                                                                                                                                                                                                                                                                                                                                                                                                                                                                                                                                                                                                                                                                                                                                                                                                                                                                                                                                                                                                                                                                                                                                                                                                                                                                                                                                                                                                                                                                                                            |
|                                    | 0.0000000000000000 0.1666688402300522 0.1327241878263905 F F F<br>0.1666688402300522 0.0000000000000000 0.0000000000000000 F F F<br>0.1695727240793698 0.0010188962164650 0.2673504587704495 T T T<br>0.3333376804600974 0.1666688402300522 0.1327241878263905 F F F<br>0.5000065206901496 0.0000000000000000 0.0000000000000000 F F F<br>0.5044196238436529 0.9954456735194726 0.2652023321220886 T T T<br>0.6666753609202019 0.1666688402300522 0.1327241878263905 F F F<br>0.8333442011502470 0.0000000000000000 0.0000000000000000 F F F<br>0.8365949860168710 -0.0028072886096135 0.2668875494334424 T T T<br>0.0000000000000000 0.5000065206901496 0.1327241878263905 F F F<br>0.1666688402300522 0.3333376804600974 0.0000000000000000 F F F<br>0.1608623912621368 0.3336425537034523 0.2668646229614051 T T T<br>0.3333376804600974 0.5000065206901496 0.1327241878263905 F F F<br>0.5000065206901496 0.3333376804600974 0.0000000000000000 F F F<br>0.6666753609202019 0.5000065206901496 0.1327241878263905 F F F<br>0.8333442011502470 0.3333376804600974 0.0000000000000000 F F F<br>0.8382048218516609 0.3242027889767929 0.2709405284045351 T T T<br>0.0000000000000000 0.8333442011502470 0.1327241878263905 F F F<br>0.1666688402300522 0.6666753609202019 0.0000000000000000 F F F<br>0.1679821960788913 0.6670888144974469 0.2670406452788016 T T T<br>0.3333376804600974 0.8333442011502470 0.1327241878263905 F F F<br>0.5000065206901496 0.6666753609202019 0.0000000000000000 F F F<br>0.4963671429502185 0.6716480965843390 0.2656847644453155 T T T<br>0.6666753609202019 0.8333442011502470 0.1327241878263905 F F F<br>0.8333442011502470 0.6666753609202019 0.0000000000000000 F F F<br>0.8358343208873518 0.6712446773533302 0.2708357521806479 T T T<br>0.4881134794634016 0.3333662791611461 0.2898736605345573 T T T<br>0.5997866691465270 0.4710506919991047 0.3943379339413383 T T T<br>0.4989030923252219 0.2502348318375691 0.4524485940695547 T T T<br>0.7684957553887265 0.4843334053309995 0.3938350710021737 T T T<br>0.5315161046330589 0.5582396231762370 0.4461033650595488 T T T<br>0.5011855798910076 0.1112240740612400 0.4350200956793580 T T T<br>0.3733600445347836 0.2884873548660034 0.4829220027970416 T T T<br>0.6032369952913462 0.2722506666382327 0.5055410909304973 T T T |

|                                    |                     |                    |                          |
|------------------------------------|---------------------|--------------------|--------------------------|
| CH <sub>3</sub> -CHO<br>Rh/Cu(111) | Cu Rh C O H         |                    |                          |
|                                    | 1.000000000000000   |                    |                          |
|                                    | 7.6679000000000004  | 0.0000000000000000 | 0.0000000000000000       |
|                                    | -3.8339499999999997 | 6.6405961900000001 | 0.0000000000000000       |
|                                    | 0.0000000000000000  | 0.0000000000000000 | 19.173899999999997       |
|                                    | Cu Rh C O H         |                    |                          |
|                                    | 26                  | 1                  | 2 1 4                    |
|                                    | Selective dynamics  |                    |                          |
|                                    | Direct              |                    |                          |
|                                    | 0.2939552023154427  | 0.1487383000727728 | 0.2183972687848248 T T T |
|                                    | 0.0740787133764584  | 0.0370448665995440 | 0.0000000000000000 F F F |
|                                    | 0.1852133131750904  | 0.2593140661968150 | 0.1088458790334812 F F F |
|                                    | 0.6289103459856112  | 0.1418849910139780 | 0.2224143558230962 T T T |
|                                    | 0.4074163938365558  | 0.0370448665995440 | 0.0000000000000000 F F F |
|                                    | 0.5185509936351949  | 0.2593140661968150 | 0.1088458790334812 F F F |
|                                    | 0.9658864823578812  | 0.1490096536607134 | 0.2186425814593523 T T T |
|                                    | 0.7407540742966532  | 0.0370448665995440 | 0.0000000000000000 F F F |
|                                    | 0.8518886740952922  | 0.2593140661968150 | 0.1088458790334812 F F F |
|                                    | 0.2920477961266116  | 0.4811608079286342 | 0.2173757704142054 T T T |
|                                    | 0.0740364784000533  | 0.3702980771068383 | 0.0000000000000000 F F F |
|                                    | 0.1851710781986924  | 0.5925672767041092 | 0.1088458790334812 F F F |
|                                    | 0.4073741588601507  | 0.3702980771068383 | 0.0000000000000000 F F F |
|                                    | 0.5185087586587898  | 0.5925672767041092 | 0.1088458790334812 F F F |
|                                    | 0.9699248406081076  | 0.4854944165269227 | 0.2169327153645828 T T T |
|                                    | 0.7407118393202552  | 0.3702980771068383 | 0.0000000000000000 F F F |
|                                    | 0.8518464391188871  | 0.5925672767041092 | 0.1088458790334812 F F F |
|                                    | 0.2968175758971113  | 0.8153948827860257 | 0.2186193288600174 T T T |
|                                    | 0.0740695378679561  | 0.7037018765027483 | 0.0000000000000000 F F F |
|                                    | 0.1852041376665952  | 0.9259710761000193 | 0.1088458790334812 F F F |
|                                    | 0.6320223556454030  | 0.8198917740758732 | 0.2172621403250557 T T T |
|                                    | 0.4074072183280606  | 0.7037018765027483 | 0.0000000000000000 F F F |
|                                    | 0.5185418181266925  | 0.9259710761000193 | 0.1088458790334812 F F F |
|                                    | 0.9703157742040316  | 0.8220625231911697 | 0.2192374637330859 T T T |
|                                    | 0.7407448987881580  | 0.7037018765027483 | 0.0000000000000000 F F F |
|                                    | 0.8518794985867970  | 0.9259710761000193 | 0.1088458790334812 F F F |
|                                    | 0.6354687064598279  | 0.4894878206484854 | 0.2360233405529087 T T T |
|                                    | 0.5558536043871691  | 0.5239555631926882 | 0.3505220145732417 T T T |
|                                    | 0.7297507526531354  | 0.4126378765608378 | 0.3221839747276927 T T T |
|                                    | 0.6589440845768763  | 0.2258503936949641 | 0.3321264347456300 T T T |
|                                    | 0.8663534158185571  | 0.5177137506381336 | 0.3513101739361379 T T T |
|                                    | 0.6741708818461408  | 0.6304981169030892 | 0.3851304480589454 T T T |
|                                    | 0.4773924604154410  | 0.6002689480784310 | 0.3306651536077150 T T T |
|                                    | 0.4475637513198782  | 0.3880245056830331 | 0.3777728152532024 T T T |

**Table S4.** Typical input files.

**Note 1:** VASP requires at least 4 input files: POSCAR (from Table S3), POTCAR (generated from the official PAW plane wave basis set library), INCAR, and KPOINTS. The following shows contents of the typical INCAR and KPOINTS files. The INCAR file differs slightly for different jobs: structural relaxation (local minimum optimization), transition state optimization, and harmonic frequency calculations. The KPOINTS file may differ if the kpoint grid differs.

**Note 2:** To use the BEEF-vdW exchange-correlation functional, the libbeef package (<https://github.com/vossjo/libbeef>) has to be compiled and linked with the VASP binary. In addition, to use the CI-NEB or dimer method for transition state optimization, the VASP Transition State Tools (VTST, <http://theory.cm.utexas.edu/vtsttools/index.html>) also has to be incorporated into the VASP source tree prior to compilation.

**Note 3:** Our INCAR files are usually generated using MedeA (a GUI for VASP, <http://archive.materialsdesign.com/medea/medea-vasp>), so some of the options may not be absolutely necessary.

## INCAR

### Local minimum optimization:

SYSTEM = CO

LUSE\_VDW=.TRUE.

AGGAC=0.0000

GGA=BF

ENCUT = 400

PREC = Normal

EDIFF = 1.0e-07

ALGO = Fast

ISPIN = 1  
ISMEAR = 1  
SIGMA = 0.2  
LREAL = .FALSE.  
IBRION = 2  
NSW = 100  
ISIF = 0  
EDIFFG = -0.01  
NELMIN = 2  
VOSKOWN = 1  
NBLOCK = 1  
NWRITE = 1  
NELM=60  
INIWAV = 1  
ISTART = 0  
ICHARG = 2  
LWAVE = .FALSE.  
LCHARG = .FALSE.  
ADDGRID = .FALSE.  
LASPH=.TRUE.  
Zab\_VDW=-1.8867

**CI-NEB method for transition states**

LUSE\_VDW=.TRUE.  
AGGAC=0.0000  
GGA=BF



ENCUT = 400  
PREC = Normal  
EDIFF = 1.0e-07  
ALGO = Fast  
ISPIN = 1  
ISMEAR = 1  
SIGMA = 0.2  
LREAL = .FALSE.  
RWIGS = 1.17 1.25 0.77 0.73 0.32  
IBRION = 3  
NSW = 400  
ISIF = 0  
EDIFFG = -0.05  
NELMIN = 2  
VOSKOWN = 1  
NBLOCK = 1  
NWRITE = 1  
NELM=60  
INIWAV = 1  
ISTART = 0  
ICHARG = 2  
LWAVE = .FALSE.  
LCHARG = .FALSE.  
ADDGRID = .FALSE.  
LASPH=.TRUE.

Zab\_VDW=-1.8867

ICHAIN = 0

POTIM = 0.05

IMAGES = 5

SPRING = -5

LCLIMB = .FALSE.

**Dimer method for transition states**

LUSE\_VDW=.TRUE.

AGGAC=0.0000

GGA=BF

ENCUT = 400

PREC = Normal

EDIFF = 1.0e-07

ALGO = Fast

ISPIN = 1

ISMEAR = 1

SIGMA = 0.2

LREAL = .FALSE.

NSW = 900

ISIF = 0

EDIFFG = -0.001

NELMIN = 2

VOSKOWN = 1

NBLOCK = 1

NWRITE = 1

NELM=60  
INIWAV = 1  
ISTART = 0  
ICHARG = 2  
LWAVE = .FALSE.  
LCHARG = .FALSE.  
ADDGRID = .FALSE.  
LASPH=.TRUE.  
Zab\_VDW=-1.8867  
ICHAIN = 2  
IBRION = 3  
POTIM = 0.0  
DdR = 0.005  
DRotMax = 4  
DFNMin = 0.01  
DFNMax = 1.0  
IOPT = 2

**Calculation for frequency**

LUSE\_VDW=.TRUE.  
AGGAC=0.0000  
GGA=BF  
ENCUT = 400  
PREC = Normal  
EDIFF = 1.0e-07  
ALGO = Fast

ISPIN = 1  
ISMEAR = 1  
SIGMA = 0.2  
LREAL = .FALSE.  
IBRION = 5  
NFREE = 2  
POTIM = 0.015  
NELMIN = 2  
VOSKOWN = 1  
NBLOCK = 1  
NWRITE = 1  
NELM=60  
INIWAV = 1  
ISTART = 0  
ICHARG = 2  
LWAVE = .FALSE.  
LCHARG = .FALSE.  
ADDGRID = .FALSE.  
LASPH = .TRUE.  
Zab\_VDW = -1.8867

## **KPOINTS**

Automatic mesh

0

Gamma

4 4 1

0. 0. 0.
